# Supplementary material
Source: PubMed Central journal article supplement (PMC4141371)
Supplement: supp_db14-0066_DB140066SupplementaryData.pdf [file supp_db14-0066_DB140066SupplementaryData.pdf]

SUPPLEMENTARY DATA

Supplementary Figure 1.

**A**

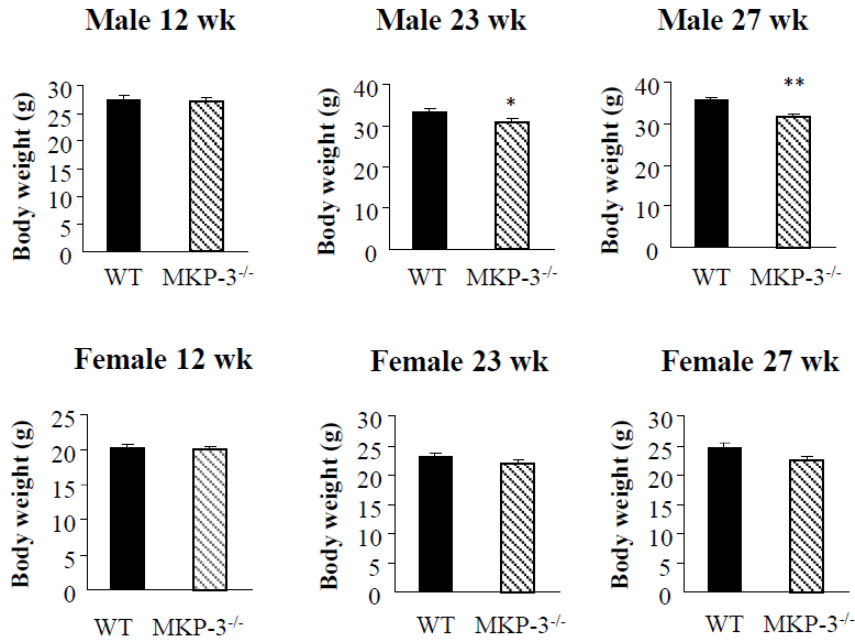

**B**

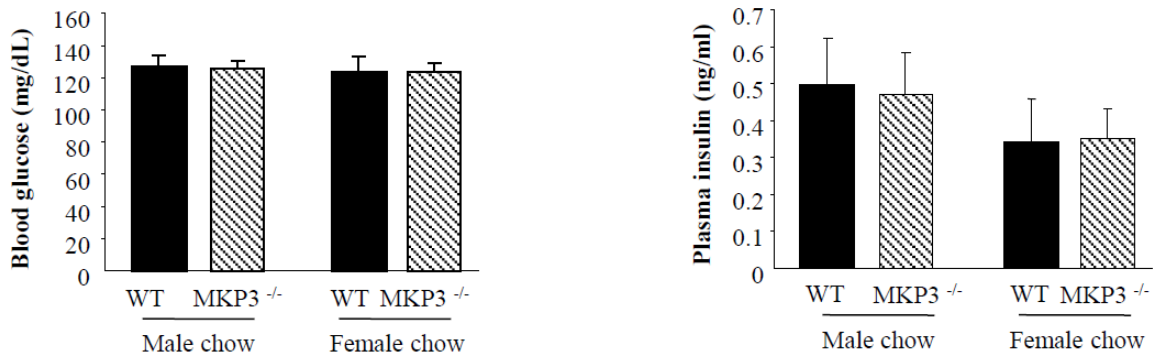

SUPPLEMENTARY DATA

Supplementary Figure 2.

A.

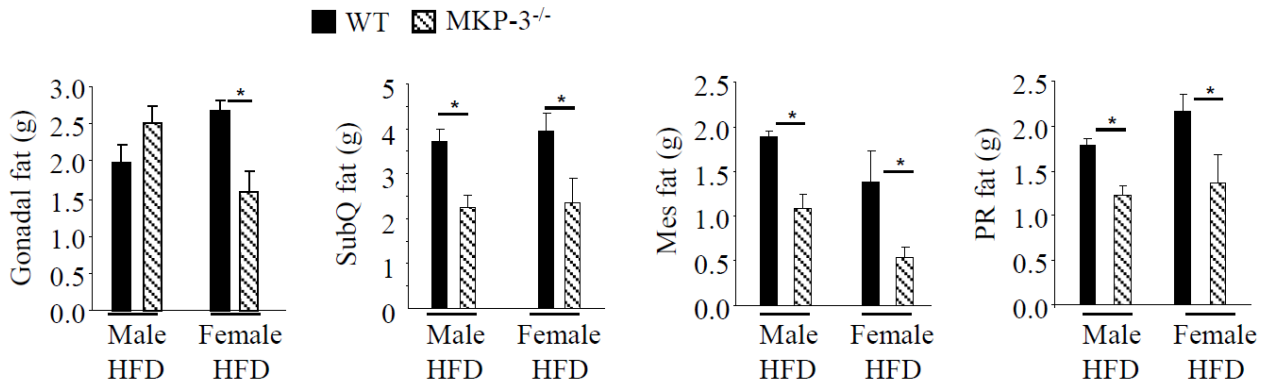

B.

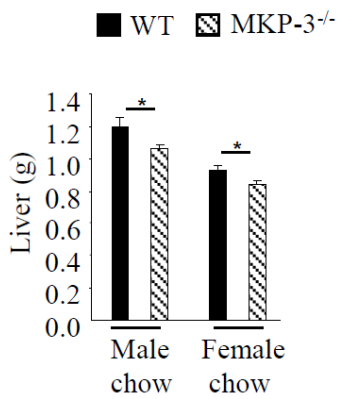

C.

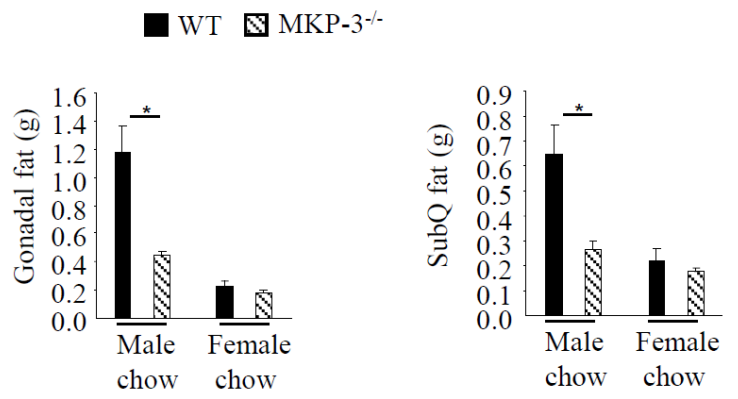

SUPPLEMENTARY DATA

**Supplementary Table 1.** Fold increase of Ser/Thr/Tyr phosphorylation in livers of MKP-3<sup>-/-</sup> male mice versus wild type male mice fed on a high fat diet (n=5 for each group).

| Symbol           | Name                                                     | Phosphorylation sites                          | KO/WT ratio                       | Q Value                              |
|------------------|----------------------------------------------------------|------------------------------------------------|-----------------------------------|--------------------------------------|
| <b>Apoptosis</b> |                                                          |                                                |                                   |                                      |
| ACIN1            | Acin1 protein                                            | S64<br>T66                                     | 11.4<br>8.3                       | 0.02<br>0.02                         |
| API5             | Apoptosis inhibitor 5                                    | S461<br>S462                                   | 2.2<br>1.8                        | 0.03<br>0.03                         |
| AIFM3            | Apoptosis-inducing factor 3                              | S30                                            | 7.4                               | 0.03                                 |
| TP53BP2          | Apoptosis-stimulating of p53 protein 2                   | S479                                           | 3.7                               | 0.02                                 |
| ACIN1            | Apoptotic chromatin condensation inducer 1               | S64S70<br>S208<br>S210<br>S479S482S491<br>S729 | 5.7<br>7.1<br>7.0<br>105.7<br>2.8 | 0.02<br>0.02<br>0.02<br>0.03<br>0.02 |
| PEA15            | Astrocytic phosphoprotein PEA-15                         | S116                                           | 10.8                              | 0.02                                 |
| BAG3             | BAG family molecular chaperone regulator 3               | S179<br>S353S357<br>S360<br>S390               | 3.3<br>2.3<br>2.3<br>8.4          | 0.02<br>0.03<br>0.03<br>0.02         |
|                  |                                                          |                                                |                                   |                                      |
| BNIP2            | BCL2/adenovirus E1B 19 kDa-interacting protein 2 alpha   | S114                                           | 3.9                               | 0.02                                 |
| BNIP3            | BCL2/adenovirus E1B 19 kDa protein-interacting protein 3 | S60<br>S85T86<br>S88                           | 19.8<br>14.5<br>6.1               | 0.03<br>0.02<br>0.02                 |
| BCL2L13          | Bcl-2-like protein 13                                    | S387<br>T389                                   | 4.0<br>3.1                        | 0.02<br>0.02                         |
| CAAP1            | Caspase activity and apoptosis inhibitor                 | S183                                           | 2.3                               | 0.03                                 |
| CARD6            | Card6 caspase recruitment domain family, member 6        | S809                                           | 3.6                               | 0.03                                 |
| CASP8            | Caspase-8                                                | S188                                           | 2.2                               | 0.02                                 |
| DAP              | Death-associated protein                                 | S51                                            | 5.4                               | 0.02                                 |
| DAPK2            | Death-associated protein kinase 2                        | S299<br>S349                                   | 3.8<br>3.5                        | 0.02<br>0.02                         |
| FAF1             | FAS-associated factor 1                                  | S269                                           | 17.1                              | 0.04                                 |
| GAS2             | Growth arrest-specific protein 2                         | T282<br>S283<br>S287<br>S289                   | 5.3<br>7.4<br>5.3<br>7.4          | 0.02<br>0.02<br>0.02<br>0.02         |
| GCH1             | GTP cyclohydrolase 1                                     | S24                                            | 3.9                               | 0.02                                 |
| HTT              | Huntingtin                                               | S398S409S411                                   | 9.7                               | 0.02                                 |
| KRT18            | Keratin, type I cytoskeletal 18                          | T9<br>S31S32S35<br>S43S45                      | 2.7<br>2.8<br>3.1                 | 0.02<br>0.02<br>0.02                 |
| PDCD5            | MCG128907                                                | S119<br>Y126                                   | 10.7<br>4.0                       | 0.02<br>0.02                         |
| BNIP3I           | MCG2480, isoform CRA_b                                   | S61S62<br>S63S64                               | 12.9<br>8.1                       | 0.03<br>0.02                         |

SUPPLEMENTARY DATA

|                                |                                                         |                                    |                          |                              |
|--------------------------------|---------------------------------------------------------|------------------------------------|--------------------------|------------------------------|
| RMDN3                          | regulator of microtubule dynamics protein 3 isoform X1  | S44<br>S46<br>S50                  | 2.8<br>4.2<br>2.8        | 0.02<br>0.02<br>0.02         |
| SERBP1                         | Plasminogen activator inhibitor 1 RNA-binding protein   | S197<br>S243                       | 12.9<br>11.1             | 0.02<br>0.02                 |
| PLEKHB2                        | Pleckstrin homology-like domain family B member 2       | S411<br>S465                       | 4.7<br>3.8               | 0.03<br>0.03                 |
| PDCD4                          | Programmed cell death protein 4                         | S76<br>T93<br>S457                 | 2.8<br>7.8<br>4.2        | 0.02<br>0.02<br>0.02         |
| RRAGC                          | Ras-related GTP-binding protein C                       | S381                               | 6.1                      | 0.02                         |
| EBAG9                          | Receptor-binding cancer antigen expressed on SiSo cells | S36                                | 11.0                     | 0.02                         |
| RMDN3                          | Regulator of microtubule dynamics protein 3             | S212                               | 1.7                      | 0.03                         |
| SGPP1                          | Sphingosine-1-phosphate phosphatase 1                   | S101                               | 9.9                      | 0.02                         |
| UACA                           | Uaca protein                                            | S240                               | 13.5                     | 0.02                         |
| <b>Autophagy</b>               |                                                         |                                    |                          |                              |
| ATG9a                          | Autophagy 9-like 1 protein                              | S735                               | 7.1                      | 0.02                         |
| UFL1                           | E3 UFM1-protein ligase 1                                | S458<br>S462                       | 10.2<br>213.8            | 0.02<br>0.02                 |
| ZSWIM8                         | Zinc finger SWIM domain-containing protein KIAA0913     | S48                                | 10.3                     | 0.03                         |
| <b>Carbohydrate metabolism</b> |                                                         |                                    |                          |                              |
| ATAD1                          | ATPase family AAA domain-containing protein 1           | S319                               | 6.5                      | 0.02                         |
| PGLS                           | 6-Phosphogluconolactonase                               | S46<br>S49                         | 49.0<br>34.0             | 0.02<br>0.02                 |
| CA5A                           | Carbonic anhydrase 5A, mitochondrial                    | S32                                | 4.9                      | 0.02                         |
| ENGASE                         | Cytosolic endo-beta-N-acetylglucosaminidase             | S16                                | 5.2                      | 0.04                         |
| ENO1                           | Enolase alpha                                           | S351                               | 2.7                      | 0.02                         |
| FBA1                           | Fructose-bisphosphate aldolase                          | S36<br>T39<br>S161<br>T227T235T241 | 3.5<br>2.5<br>1.7<br>2.5 | 0.02<br>0.02<br>0.03<br>0.02 |
| GCGR                           | Glucagon receptor                                       | S433<br>S436                       | 17.0<br>18.0             | 0.02<br>0.02                 |
| GAPDH                          | Glyceraldehyde-3-phosphate dehydrogenase                | S149T151<br>S208                   | 3.5<br>2.4               | 0.02<br>0.02                 |
| GYS2                           | Glycogen [starch] synthase, liver                       | S8T10S11<br>T626<br>S627           | 5.7<br>8.7<br>7.2        | 0.02<br>0.02<br>0.02         |
| GYS1                           | Glycogen [starch] synthase, muscle                      | S653S657                           | 5.3                      | 0.02                         |
| GSK3B                          | Glycogen synthase kinase 3 beta                         | Y216                               | 4.3                      | 0.02                         |
| GSK3A                          | Glycogen synthase kinase-3 alpha                        | T19<br>S21                         | 1.8<br>1.7               | 0.03<br>0.03                 |
| PGAM1                          | MCG113582                                               | S14                                | 3.0                      | 0.02                         |
| PPP1R2                         | MCG126099, isoform CRA_b                                | S122S123                           | 3.9                      | 0.02                         |
| TOMM70A                        | Mitochondrial import receptor subunit TOM70             | S94S99<br>S105<br>S108S113         | 9.8<br>3.1<br>4.8        | 0.02<br>0.02<br>0.02         |
| PGM3                           | Phosphoacetylglucosamine mutase                         | S64                                | 3.5                      | 0.02                         |
| PGM2                           | Phosphoglucomutase 2                                    | S135                               | 9.0                      | 0.02                         |

SUPPLEMENTARY DATA

|                                               |                                                                         |              |      |      |
|-----------------------------------------------|-------------------------------------------------------------------------|--------------|------|------|
|                                               |                                                                         | T171         | 4.2  | 0.02 |
| STBD1                                         | Stbd1 protein                                                           | S161         | 8.4  | 0.02 |
| TPI1                                          | Triosephosphate isomerase                                               | Y127S130     | 3.6  | 0.02 |
| UGDH                                          | UDP-glucose 6-dehydrogenase                                             | T474         | 2.1  | 0.03 |
| SLC35A3                                       | UDP-N-acetylglucosamine transporter isoform X1                          | S115         | 15.0 | 0.02 |
| <b>Cell adhesion and extracellular matrix</b> |                                                                         |              |      |      |
| AF6                                           | Afadin                                                                  | S1173        | 3.2  | 0.02 |
|                                               |                                                                         | S1182        | 3.9  | 0.02 |
|                                               |                                                                         | S1275        | 5.4  | 0.02 |
| FN1                                           | Anastellin                                                              | S280         | 6.6  | 0.02 |
|                                               |                                                                         | S283         | 6.2  | 0.02 |
|                                               |                                                                         | S2475        | 3.0  | 0.02 |
| ARVCF                                         | Armadillo repeat protein deleted in velo-cardio-facial syndrome homolog | S269         | 1.9  | 0.03 |
|                                               |                                                                         | S345         | 7.9  | 0.03 |
| CDHR5                                         | Cadherin-related family member 5                                        | S753         | 5.3  | 0.02 |
| CTNNA1                                        | Catenin alpha-1                                                         | S641         | 5.9  | 0.02 |
|                                               |                                                                         | S652T654S655 | 6.2  | 0.02 |
|                                               |                                                                         | T658         | 6.4  | 0.02 |
| CD44                                          | CD44 antigen                                                            | S612         | 2.4  | 0.03 |
| CEACAM1                                       | CEA-related cell adhesion molecule 1                                    | T462S469     | 2.0  | 0.02 |
| CGN                                           | Cingulin                                                                | S89S90       | 2.3  | 0.02 |
|                                               |                                                                         | S114         | 2.2  | 0.03 |
|                                               |                                                                         | S131S134     | 3.5  | 0.02 |
|                                               |                                                                         | S445         | 4.7  | 0.02 |
| CLDN5                                         | Claudin-5                                                               | T207         | 1.9  | 0.02 |
| EZR                                           | Ezrin                                                                   | Y565         | 3.4  | 0.02 |
| GP1BB                                         | Glycoprotein Ib, beta polypeptide                                       | S194         | 3.9  | 0.02 |
| PPFIBP1                                       | Liprin-beta-1                                                           | S435         | 4.1  | 0.02 |
| PPFIBP2                                       | Liprin-beta-2                                                           | S518         | 1.9  | 0.02 |
| LMO7                                          | Lmo7 protein                                                            | S255         | 5.0  | 0.02 |
|                                               |                                                                         | S453         | 2.5  | 0.03 |
|                                               |                                                                         | S904S906     | 3.3  | 0.02 |
|                                               |                                                                         | S993         | 3.6  | 0.02 |
|                                               |                                                                         | S1069        | 5.1  | 0.02 |
| 2410018M08RI<br>K                             | MCG130675                                                               | S45          | 3.6  | 0.02 |
| CLDN3                                         | MCG16699                                                                | T203         | 9.8  | 0.02 |
| MFAP1                                         | Microfibrillar-associated protein 1                                     | S116S118     | 15.5 | 0.02 |
| OCLN                                          | Occludin                                                                | Y367         | 21.2 | 0.02 |
| PPHLN1                                        | Periplin-1                                                              | S219         | 3.8  | 0.02 |
| PVR                                           | Poliovirus receptor                                                     | S381         | 5.1  | 0.02 |
| PCDH1                                         | Protocadherin 1                                                         | S962         | 20.0 | 0.02 |
| STAB2                                         | Stabilin-2                                                              | S2503        | 6.5  | 0.02 |
| SYMPK                                         | Symplekin                                                               | S1271        | 3.1  | 0.02 |
|                                               |                                                                         | S1272        | 3.3  | 0.02 |
|                                               |                                                                         | S2040        | 3.3  | 0.02 |
| TLN1                                          | Talin-1                                                                 | S2040        | 3.3  | 0.02 |
| TROAP                                         | Tastin                                                                  | T159T160     | 3.3  | 0.02 |
| TJP1                                          | Tight junction protein ZO-1                                             | S125Y132     | 3.3  | 0.02 |
|                                               |                                                                         | S175S178S179 | 2.6  | 0.02 |
|                                               |                                                                         | S617         | 4.2  | 0.02 |
|                                               |                                                                         | S622         | 5.0  | 0.02 |
|                                               |                                                                         | S912         | 4.4  | 0.02 |
| TJP2                                          | Tight junction protein ZO-2                                             | S107         | 3.4  | 0.02 |

SUPPLEMENTARY DATA

|                   |                                                        |              |      |      |
|-------------------|--------------------------------------------------------|--------------|------|------|
|                   |                                                        | S213         | 1.6  | 0.03 |
|                   |                                                        | S404         | 2.6  | 0.02 |
|                   |                                                        | S968         | 2.3  | 0.02 |
|                   |                                                        | S1133        | 2.2  | 0.02 |
| TLN2              | Tln2 talin-2                                           | T1844        | 3.4  | 0.02 |
| TNS1              | Tns1 tensin 1                                          | S792         | 10.6 | 0.02 |
|                   |                                                        | S899         | 8.7  | 0.02 |
|                   |                                                        | S1062        | 4.6  | 0.02 |
|                   |                                                        | S1346        | 2.0  | 0.02 |
|                   |                                                        | T1357        | 4.4  | 0.02 |
|                   |                                                        | S1363        | 5.2  | 0.02 |
|                   |                                                        | S1375        | 1.7  | 0.02 |
|                   |                                                        | S1397        | 5.2  | 0.02 |
|                   |                                                        | S1399        | 2.5  | 0.02 |
|                   |                                                        | S1423        | 3.7  | 0.02 |
|                   |                                                        | S1451        | 3.7  | 0.02 |
|                   |                                                        | S1468S1470   | 4.3  | 0.02 |
|                   |                                                        | S1535T1537   | 5.8  | 0.02 |
| TFIP11            | Tuftelin-interacting protein 11                        | S96S99       | 18.5 | 0.02 |
| VCL               | Vinculin                                               | S290         | 5.9  | 0.02 |
|                   |                                                        | S346         | 4.3  | 0.02 |
| <b>Cell cycle</b> |                                                        |              |      |      |
|                   |                                                        |              |      |      |
| ABI1              | Abl-interactor 1                                       | S225         | 19   | 0.02 |
|                   |                                                        | T229S231     | 6.6  | 0.02 |
| AHSG              | Alpha-2-HS-glycoprotein                                | T130         | 6.6  | 0.02 |
|                   |                                                        | S134         | 6.6  | 0.02 |
|                   |                                                        | S138         | 10.9 | 0.02 |
|                   |                                                        | S309S312S314 | 5.0  | 0.02 |
| ARMC10            | Armadillo repeat-containing protein 10                 | S43          | 7.2  | 0.02 |
| BRAP              | BRCA1-associated protein                               | S116         | 58.5 | 0.02 |
| CALU              | Calumenin                                              | S69          | 3.8  | 0.02 |
| CD2BP2            | CD2 antigen cytoplasmic tail-binding protein 2         | S196         | 1.5  | 0.04 |
| CDKN2AIP          | CDKN2A-interacting protein                             | S168         | 3.0  | 0.03 |
| CETN2             | Centrin-2                                              | S20          | 1.8  | 0.04 |
| CENPA             | Centromere protein A, isoform CRA_c                    | S15          | 3.4  | 0.02 |
| CGNL1             | Cingulin-like 1                                        | T250         | 1.7  | 0.03 |
|                   |                                                        | S284         | 2.3  | 0.02 |
| CLASP1            | CLIP-associating protein 1                             | S600         | 15.3 | 0.02 |
|                   |                                                        | T650         | 10.8 | 0.02 |
| CRIP2             | Crip2 protein                                          | S114         | 6.0  | 0.02 |
|                   | Cutaneous T-cell lymphoma-associated antigen 5 homolog | S533         | 5.2  | 0.02 |
|                   |                                                        | S540         | 7.7  | 0.02 |
|                   |                                                        | S628         | 4.0  | 0.02 |
| CDK9              | Cyclin-dependent kinase 9                              | S347         | 6.1  | 0.02 |
| CDK11             | Cyclin-dependent kinase 11                             | S47          | 5.1  | 0.03 |
| CDK12             | Cyclin-dependent kinase 12                             | Y888T889     | 6.6  | 0.02 |
| CDK13             | Cyclin-dependent kinase 13                             | S341S343S349 | 6.5  | 0.02 |
|                   |                                                        | Y862         | 4.7  | 0.02 |
|                   |                                                        | Y870T871     | 4.4  | 0.02 |
|                   |                                                        | T1143S1146   | 5.5  | 0.03 |
| CDKN1B            | Cyclin-dependent kinase inhibitor 1B                   | S7S10        | 4.2  | 0.02 |

SUPPLEMENTARY DATA

|         |                                                   |                 |      |      |
|---------|---------------------------------------------------|-----------------|------|------|
| CCNK    | Cyclin-K                                          | S341            | 19.4 | 0.02 |
| CCNL1   | Cyclin-L1                                         | S358            | 6.0  | 0.03 |
|         |                                                   | S380            | 8.9  | 0.03 |
| CCNL2   | Cyclin-L2                                         | S328            | 13.2 | 0.02 |
|         |                                                   | S345            | 3.8  | 0.02 |
| CCNY    | Cyclin-Y                                          | S326            | 5.7  | 0.02 |
| SPECC1L | Cytospin-A                                        | S833            | 4.6  | 0.02 |
| MEPCE   | 7SK snRNA methylphosphate capping enzyme          | S126            | 2.8  | 0.02 |
|         |                                                   | T188S192        | 6.8  | 0.02 |
| DPH1    | Diphthamide biosynthesis protein 1                | S418            | 2.0  | 0.03 |
| DLG1    | Disks large homolog 1                             | S534            | 10.5 | 0.02 |
|         |                                                   | S537S538S540    | 9.5  | 0.02 |
|         |                                                   | S542            | 4.5  | 0.02 |
|         |                                                   | T651            | 3.9  | 0.02 |
|         |                                                   | S655            | 9.7  | 0.02 |
| DNM1L   | Dynammin-1-like protein                           | S532            | 7.0  | 0.02 |
| DNCLH1  | Dynein cytoplasmic 1 light intermediate chain 1   | S516            | 3.5  | 0.02 |
| UHRF2   | E3 ubiquitin-protein ligase UHRF2                 | S668            | 4.5  | 0.02 |
| GNL3    | Guanine nucleotide-binding protein-like 3         | S505            | 3.8  | 0.02 |
| LIGL2   | Lethal(2) giant larvae protein homolog 2          | S1046           | 8.0  | 0.02 |
| PCNP    | MCG130899                                         | T139T141        | 5.0  | 0.02 |
| GPS1    | MCG2137, isoform CRA_b                            | S509            | 4.7  | 0.02 |
|         |                                                   | S518S520        | 7.5  | 0.02 |
| NPM1    | MCG68069                                          | S125            | 1.8  | 0.03 |
| MTUS1   | Microtubule-associated tumor suppressor 1 homolog | S1208           | 3.3  | 0.02 |
| NBR1    | Nbr1 protein                                      | T659            | 3.3  | 0.02 |
| NIPBL   | Nipped-B-like protein                             | S2652           | 8.6  | 0.02 |
| HMGN1   | Non-histone chromosomal protein HMG-14            | T71T80          | 4.5  | 0.02 |
|         |                                                   | S84             | 2.8  | 0.02 |
|         |                                                   | S87             | 4.5  | 0.02 |
| ZC3HC1  | Nuclear-interacting partner of ALK                | S295            | 6.1  | 0.02 |
|         |                                                   | S364            | 7.2  | 0.02 |
| NUMA1   | Numa1 Nuclear mitotic apparatus protein 1         | S1739           | 4.3  | 0.02 |
|         |                                                   | S1835           | 4.6  | 0.02 |
|         |                                                   | S1974           | 1.5  | 0.02 |
|         |                                                   | T1982           | 3.6  | 0.03 |
| PARD3   | Pard3 protein                                     | S383            | 4.0  | 0.02 |
| PWP1    | Periodic tryptophan protein 1 homolog             | S486S491S493    | 6.0  | 0.02 |
| PINX1   | PIN2/TERF1-interacting telomerase inhibitor 1     | T228S233        | 4.3  | 0.02 |
| RRP15   | RRP15-like protein                                | S265            | 3.6  | 0.02 |
| SASH1   | SAM and SH3 domain-containing protein 1           | S831            | 3.4  | 0.02 |
| SEPT2   | Septin-2                                          | S218            | 5.0  | 0.02 |
| SEPT7   | Septin-7                                          | T425            | 3.2  | 0.02 |
| SEPT9   | Septin 9                                          | S64             | 8.6  | 0.02 |
| SIPA1   | Signal-induced proliferation-associated protein 1 | S72             | 4.7  | 0.03 |
| PDS5B   | Sister chromatid cohesion protein PDS5 homolog B  | S1160S1165S1166 | 18.5 | 0.02 |
|         |                                                   | 6               |      |      |
|         |                                                   | S1356           | 10.1 | 0.02 |
|         |                                                   | S1360           | 9.3  | 0.02 |
|         |                                                   | S1381           | 7.6  | 0.02 |

SUPPLEMENTARY DATA

|                     |                                                             |              |      |      |
|---------------------|-------------------------------------------------------------|--------------|------|------|
| SPHK2               | Sphingosine kinase 2                                        | S364         | 7.2  | 0.02 |
| WAPAL               | Wings apart-like protein homolog                            | S77          | 3.3  | 0.02 |
|                     |                                                             | S226         | 6.7  | 0.02 |
| ZZEF1               | Zinc finger ZZ-type and EF-hand domain-containing protein 1 | S1538        | 6.5  | 0.02 |
| ZWINT               | ZW10 interactor                                             | S216         | 6.9  | 0.02 |
| <b>Cytoskeleton</b> |                                                             |              |      |      |
| ABLIM1              | Actin-binding LIM protein 1                                 | S475         | 2.2  | 0.02 |
|                     |                                                             | S496         | 2.8  | 0.02 |
| ABLIM3              | Actin-binding LIM protein 3                                 | S373         | 2.9  | 0.02 |
|                     |                                                             | S502S503     | 3.3  | 0.02 |
| SVIL                | Archvillin                                                  | S857         | 2.5  | 0.03 |
|                     |                                                             | S960         | 3.3  | 0.02 |
| RCSD1               | CapZ-interacting protein                                    | S177S179     | 3.4  | 0.02 |
| CDC42EP1            | Cdc42 effector protein 1                                    | S205S207     | 1.7  | 0.03 |
|                     |                                                             | S121         | 8.9  | 0.02 |
| CDC42EB4            | Cdc42 effector protein 4                                    | S64          | 5.1  | 0.02 |
| DMTN                | Dematin                                                     | S226         | 2.3  | 0.02 |
| DSP                 | Desmoplakin                                                 | S2219S2221   | 4.9  | 0.02 |
|                     |                                                             | T2607        | 3.6  | 0.02 |
|                     |                                                             | S2620        | 11.9 | 0.02 |
| EPPK1               | Epiplakin                                                   | S1537        | 2.7  | 0.02 |
|                     |                                                             | S2705        | 5.9  | 0.02 |
|                     |                                                             | S2707        | 4.3  | 0.02 |
| FNBP1               | Formin binding protein 1                                    | S296S299     | 2.0  | 0.02 |
| FNBP2               | Formin-like protein 2                                       | S171         | 8.0  | 0.02 |
| GPHN                | Gephyrin                                                    | S327S328     | 5.9  | 0.02 |
|                     |                                                             | S336S338     | 5.8  | 0.02 |
| CASK                | Isoform 3 of Peripheral plasma membrane protein CASK        | S569         | 7.8  | 0.02 |
|                     |                                                             | S570S571     | 7.0  | 0.02 |
| KRT8                | Keratin, type II cytoskeletal 8                             | S24          | 3.5  | 0.02 |
|                     |                                                             | S482S484S489 | 3.7  | 0.02 |
| KIF13B              | Kif13b kinesin family member 13B                            | S1380        | 5.7  | 0.02 |
|                     |                                                             | S1390S1395   | 5.2  | 0.02 |
|                     |                                                             | S1409        | 6.5  | 0.02 |
|                     |                                                             | S1414        | 4.3  | 0.02 |
|                     |                                                             | T1653        | 5.5  | 0.02 |
|                     |                                                             | S1654        | 5.6  | 0.02 |
|                     |                                                             | S1705        | 3.5  | 0.02 |
|                     |                                                             | S1794        | 4.4  | 0.03 |
|                     |                                                             | S1795        | 3.0  | 0.03 |
|                     |                                                             | S1812        | 5.7  | 0.02 |
|                     |                                                             | S1814        | 5.0  | 0.02 |
| KIF1B               | Kinesin family member 1B                                    | T1406        | 6.9  | 0.02 |
| KLC4                | Kinesin light chain 4                                       | S590         | 2.4  | 0.03 |
| KIF1C               | Kinesin-like protein KIF1C                                  | S674S676     | 3.5  | 0.02 |
| KIF21A              | Kinesin-like protein KIF21A                                 | S1241        | 3.0  | 0.02 |
| KIF7                | Kinesin-like protein KIF7                                   | S1078        | 8.5  | 0.02 |
| LIMA1               | LIM domain and actin-binding protein 1                      | T12          | 3.3  | 0.02 |
|                     |                                                             | S488         | 7.1  | 0.02 |
|                     |                                                             | S735         | 4.1  | 0.02 |
| MPP5                | MAGUK p55 subfamily member 5                                | S83          | 1.6  | 0.02 |
| MAP7D1              | MAP7 domain-containing protein 1                            | S401         | 10.7 | 0.03 |



SUPPLEMENTARY DATA

|                                    |                                                          |                 |      |      |
|------------------------------------|----------------------------------------------------------|-----------------|------|------|
| MAP1                               | Microtubule-associated protein                           | S517            | 3.2  | 0.02 |
|                                    |                                                          | S761T762        | 3.1  | 0.02 |
|                                    |                                                          | T745S748        | 3.5  | 0.02 |
| MAP1S                              | Microtubule-associated protein 1S                        | S462            | 2.9  | 0.02 |
| PALLD                              | Palladin                                                 | S1141S1143S1146 | 5.0  | 0.02 |
|                                    |                                                          | S901            | 4.5  | 0.03 |
| PALMD                              | Palmdelphin                                              | T318T320        | 5.4  | 0.02 |
|                                    |                                                          | S370S372        | 4.3  | 0.02 |
|                                    |                                                          | S375            | 8.6  | 0.02 |
|                                    |                                                          | S384S385        | 2.8  | 0.02 |
| PXN                                | Paxillin                                                 | Y118            | 3.2  | 0.02 |
|                                    |                                                          | S137            | 13.1 | 0.03 |
|                                    |                                                          | S321            | 13.3 | 0.02 |
| PLEC                               | Plectin                                                  | S4392           | 2.6  | 0.02 |
|                                    |                                                          | S4393           | 2.4  | 0.02 |
| EPB41                              | Protein 4.1                                              | S552            | 5.3  | 0.02 |
|                                    |                                                          | S541S543        | 4.8  | 0.02 |
|                                    |                                                          | S678            | 35.9 | 0.03 |
| SHROOM1                            | Protein Shroom1                                          | S188            | 3.2  | 0.02 |
|                                    |                                                          | S224            | 12.4 | 0.02 |
| ROCK2                              | Rho-associated protein kinase 2                          | S1374           | 5.5  | 0.02 |
| SLAIN2                             | SLAIN motif-containing protein 2                         | S392            | 1.8  | 0.03 |
| GW7_15253                          | Spectrin beta chain, brain 1                             | S2102           | 2.3  | 0.02 |
|                                    |                                                          | S2159           | 2.1  | 0.02 |
|                                    |                                                          | S2163S2164S2168 | 4.8  | 0.02 |
|                                    |                                                          | S2339           | 2.8  | 0.02 |
|                                    |                                                          | S2340           | 2.2  | 0.02 |
| CTTN                               | Src substrate cortactin                                  | S113            | 3.4  | 0.02 |
| TJP3                               | Tight junction protein 3                                 | S103            | 4.5  | 0.02 |
|                                    |                                                          | S106S111        | 4.2  | 0.02 |
|                                    |                                                          | S343            | 3.5  | 0.02 |
|                                    |                                                          | S366            | 3.7  | 0.02 |
| TPPP                               | Tubulin polymerization-promoting protein                 | T15S19          | 4.7  | 0.02 |
| VASP                               | Vasodilator-stimulated phosphoprotein                    | S235            | 5.9  | 0.02 |
| FAM21                              | WASH complex subunit FAM21                               | S388            | 4.5  | 0.02 |
|                                    |                                                          | S747            | 3.6  | 0.02 |
| <b>DNA repair and modification</b> |                                                          |                 |      |      |
| ALKBH3                             | Alpha-ketoglutarate-dependent dioxygenase alkB homolog 3 | T24             | 1.6  | 0.03 |
|                                    |                                                          | S28             | 2.2  | 0.02 |
| ANKRD17                            | Ankyrin repeat domain-containing protein 17              | S2055           | 3.7  | 0.02 |
| APEX1                              | Apurinic/apyrimidinic endonuclease 1                     | S18             | 7.5  | 0.02 |
| WRNIP1                             | ATPase WRNIP1                                            | S151            | 6.2  | 0.02 |
|                                    |                                                          | S153            | 5.7  | 0.02 |
| MSH6                               | DNA mismatch repair protein Msh6                         | S62             | 5.2  | 0.02 |
| XPC                                | DNA repair protein complementing XP-C cells homolog      | S93             | 6.6  | 0.02 |
|                                    |                                                          | S395S397        | 8.4  | 0.02 |
|                                    |                                                          | S382            | 6.4  | 0.02 |
| SFR1                               | DNA repair protein Sfr1                                  | S51T54          | 3.7  | 0.02 |
|                                    |                                                          | S99             | 23.1 | 0.02 |
| TOP2B                              | DNA topoisomerase 2-beta                                 | S1453           | 9.9  | 0.02 |
|                                    |                                                          | S1537S1539      | 11.7 | 0.02 |

SUPPLEMENTARY DATA

|                        |                                                                  |              |      |      |
|------------------------|------------------------------------------------------------------|--------------|------|------|
| RNF168                 | E3 ubiquitin-protein ligase RNF168                               | T501         | 4.3  | 0.02 |
| GEN1                   | Flap endonuclease GEN homolog 1                                  | T462         | 5.3  | 0.02 |
|                        | Junction-mediating and –regulatory protein                       | S58          | 1.6  | 0.03 |
| NHEJ1                  | Non-homologous end-joining factor 1                              | S243         | 3.6  | 0.03 |
|                        |                                                                  | S245         | 7.7  | 0.02 |
| DEK                    | Protein DEK                                                      | S33          | 2.7  | 0.02 |
| RAD23A                 | Rad23a protein                                                   | S123S128     | 2.4  | 0.02 |
| RECQL5                 | RecQ helicase protein-like 5 beta                                | S489S492     | 13.5 | 0.03 |
| RNF169                 | Rnf169 ring finger protein 169                                   | S279         | 3.6  | 0.02 |
| ZC3HAV1                | Zinc finger CCCH-type antiviral protein 1                        | S324         | 3.7  | 0.02 |
| <b>DNA replication</b> |                                                                  |              |      |      |
| MCM2                   | DNA replication licensing factor MCM2                            | S40          | 2.4  | 0.03 |
| POLM                   | Polymerase (DNA directed), mu                                    | S467         | 3.3  | 0.02 |
| RER1                   | Protein RER1                                                     | S95          | 7.0  | 0.02 |
| RNASEH1                | Ribonuclease H1                                                  | S74S80       | 2.2  | 0.03 |
| <b>Development</b>     |                                                                  |              |      |      |
| EPB41L5                | Band 4.1-like protein 5                                          | T387         | 8.2  | 0.02 |
| SNTB1                  | Beta-1-syntrophin                                                | T73          | 5.4  | 0.02 |
|                        |                                                                  | S86          | 4.0  | 0.02 |
|                        |                                                                  | S218         | 3.3  | 0.02 |
| BIN1                   | Bin1 protein                                                     | S267S273     | 2.0  | 0.02 |
| C2CD2                  | C2cd2 C2 calcium-dependent domain containing 2                   | S649         | 8.4  | 0.02 |
| IBTK                   | Inhibitor of Bruton tyrosine kinase                              | S1046        | 4.7  | 0.02 |
| DLG1                   | Isoform 2 of Disks large homolog 1                               | S665         | 6.6  | 0.02 |
|                        |                                                                  | T672         | 3.3  | 0.02 |
| DLG1                   | Isoform 3 of Disks large homolog 1                               | S671         | 2.0  | 0.03 |
| IMNA                   | Lamin A                                                          | S17S18       | 2.6  | 0.02 |
|                        |                                                                  | S22          | 2.7  | 0.02 |
|                        |                                                                  | S390S392T394 | 2.6  | 0.03 |
| LUZP1                  | Leucine zipper protein 1                                         | S395         | 2.2  | 0.03 |
|                        |                                                                  | S660         | 2.6  | 0.02 |
| LSR                    | Lipolysis-stimulated lipoprotein receptor                        | S307         | 6.3  | 0.02 |
|                        |                                                                  | S308         | 6.5  | 0.02 |
|                        |                                                                  | S436         | 1.9  | 0.03 |
|                        |                                                                  | S473Y478     | 5.1  | 0.02 |
|                        |                                                                  | S588S591     | 2.9  | 0.02 |
| MATR3                  | Matrin 3                                                         | S188         | 3.1  | 0.02 |
|                        |                                                                  | S598S604     | 3.8  | 0.02 |
|                        |                                                                  | S619         | 6.0  | 0.02 |
|                        |                                                                  | S630         | 36.1 | 0.03 |
| MOB1A                  | Mps one binder kinase activator-like 1A                          | T35          | 6.6  | 0.02 |
| NUCKS1                 | Nuclear ubiquitous casein and cyclin-dependent kinases substrate | S19          | 4.9  | 0.02 |
|                        |                                                                  | S50          | 5.5  | 0.02 |
|                        |                                                                  | S54S58S61    | 18.6 | 0.02 |
|                        |                                                                  | S73S75S79    | 8.9  | 0.02 |
|                        |                                                                  | S181         | 5.6  | 0.02 |
|                        |                                                                  | S214         | 5.0  | 0.02 |
| PDLIM4                 | PDZ and LIM domain 4                                             | S118S119     | 4.8  | 0.02 |
| PDLIM5                 | PDZ and LIM domain protein 5                                     | S228         | 1.9  | 0.03 |
|                        |                                                                  | S308         | 4.0  | 0.02 |
| PHACTR4                | Phosphatase and actin regulator 4                                | S117         | 3.9  | 0.02 |
|                        | Plakophilin 2                                                    | S102         | 3.4  | 0.02 |
|                        |                                                                  | S131         | 3.0  | 0.02 |

SUPPLEMENTARY DATA

|                          |                                                         |                      |      |      |
|--------------------------|---------------------------------------------------------|----------------------|------|------|
|                          |                                                         | S132S135             | 9.5  | 0.02 |
|                          |                                                         | S151S154             | 5.8  | 0.02 |
| PLEKHA7                  | Pleckstrin homology domain-containing family A member 7 | S481S482             | 5.1  | 0.02 |
| COBL                     | Protein cordon-bleu                                     | S1103                | 5.7  | 0.02 |
| FAM83H                   | Protein FAM83H                                          | S522                 | 4.1  | 0.02 |
|                          |                                                         | S639                 | 2.0  | 0.03 |
|                          |                                                         | S871                 | 4.1  | 0.02 |
|                          |                                                         | S904                 | 3.9  | 0.02 |
|                          |                                                         | S915                 | 4.6  | 0.02 |
|                          |                                                         | S926                 | 5.3  | 0.02 |
|                          |                                                         | S948                 | 3.3  | 0.02 |
|                          |                                                         | S1041                | 3.2  | 0.02 |
|                          |                                                         | T1042                | 3.5  | 0.02 |
| LNP                      | Protein lunapark                                        | S411                 | 21.5 | 0.02 |
| NUMB                     | Protein numb homolog                                    | S636                 | 2.9  | 0.02 |
| TGM1                     | Protein-glutamine gamma-glutamyltransferase K           | S91S94               | 7.1  | 0.02 |
| SHROOM2                  | SHROOM2                                                 | S443                 | 12.1 | 0.03 |
|                          |                                                         | S957S959S960S962T963 | 2.3  | 0.02 |
| SNTB2                    | Sntb2 protein                                           | S88                  | 6.2  | 0.02 |
|                          |                                                         | S90                  | 4.7  | 0.02 |
| SPAG9                    | Sperm associated antigen 9 (Fragment)                   | S366                 | 3.1  | 0.02 |
|                          |                                                         | S368S369             | 4.6  | 0.02 |
| UTRN                     | Utrn utrophin                                           | S933                 | 3.6  | 0.02 |
| WDTC1                    | WD and tetratricopeptide repeats 1                      | S511                 | 3.0  | 0.03 |
| WDR33                    | Wdr33 WD repeat domain 33 isoform 1                     | S1204                | 4.4  | 0.02 |
| <b>Heme biosynthesis</b> |                                                         |                      |      |      |
| ALAD                     | Delta-aminolevulinic acid dehydratase                   | S214                 | 2.5  | 0.03 |
| <b>Immune response</b>   |                                                         |                      |      |      |
| CLMN                     | Calmin                                                  | S317                 | 4.3  | 0.02 |
| CFH                      | Complement factor H                                     | Y1195                | 2.5  | 0.03 |
|                          |                                                         | S1196S1198           | 3.6  | 0.03 |
| CRRY                     | Complement regulatory protein Crry                      | Y450                 | 8.8  | 0.02 |
|                          |                                                         | S454                 | 6.8  | 0.02 |
|                          |                                                         | S483                 | 8.0  | 0.02 |
| DBNL                     | Drebrin-like protein                                    | S277                 | 2.0  | 0.03 |
|                          |                                                         | T278                 | 2.9  | 0.02 |
| EDC3                     | Enhancer of mRNA-decapping protein 3                    | S131                 | 1.7  | 0.02 |
| FYB                      | FYN binding protein                                     | S27S30               | 2.6  | 0.02 |
| GNL1                     | Guanine nucleotide-binding protein-like 1               | T48S51S55            | 6.9  | 0.02 |
| HCK                      | Hemopoietic cell kinase                                 | Y388                 | 5.7  | 0.02 |
| PSMD11                   | MCG19050, isoform CRA_d                                 | S14                  | 3.4  | 0.02 |
| IFIH1                    | Melanoma differentiation-associated protein 5           | T286                 | 4.6  | 0.02 |
|                          |                                                         | S645S648             | 2.5  | 0.02 |
| HMHA1                    | Minor histocompatibility protein HA-1                   | S577                 | 4.8  | 0.02 |
| MAVS                     | mitochondrial antiviral-signaling protein isoform 1     | S152                 | 13.9 | 0.02 |
| SERPING1                 | Plasma protease C1 inhibitor                            | S41                  | 2.0  | 0.03 |
| <b>Lipid metabolism</b>  |                                                         |                      |      |      |
| ACC1                     | Acetyl-CoA carboxylase 1                                | S23S29               | 3.3  | 0.02 |
|                          |                                                         | S76                  | 3.1  | 0.02 |

SUPPLEMENTARY DATA

|                             |                                                               |          |      |      |
|-----------------------------|---------------------------------------------------------------|----------|------|------|
|                             |                                                               | S79      | 2.8  | 0.02 |
| ACC2                        | Acetyl-Coenzyme A carboxylase beta                            | S1332    | 2.3  | 0.03 |
| ACSS2                       | Acetyl-Coenzyme A synthetase, cytoplasmic                     | S30      | 3.9  | 0.02 |
|                             |                                                               | S263     | 3.0  | 0.02 |
|                             |                                                               | S267     | 1.9  | 0.02 |
| ACOT1                       | Acyl-coenzyme A thioesterase 1                                | S327S333 | 2.7  | 0.03 |
| ACOT5                       | Acyl-coenzyme A thioesterase 5                                | S56      | 2.1  | 0.03 |
| ACSM5                       | Acyl-coenzyme A synthetase 5, mitochondrial                   | S210     | 12.5 | 0.03 |
| APOE                        | Apolipoprotein E                                              | S319     | 2.2  | 0.02 |
| ACLY                        | ATP citrate lyase                                             | S455     | 3.9  | 0.02 |
|                             |                                                               | S478S481 | 11.7 | 0.02 |
| PCYT1A                      | Choline-phosphate cytidyltransferase A                        | S319     | 6.8  | 0.02 |
|                             |                                                               | S321     | 5.2  | 0.02 |
|                             |                                                               | S322     | 6.8  | 0.02 |
|                             |                                                               | T342     | 1.8  | 0.03 |
|                             |                                                               | S343     | 1.8  | 0.03 |
| ELOVL5                      | Elongation of very long chain fatty acids protein 5           | S273T281 | 8.2  | 0.02 |
|                             |                                                               | S283*    | 13.8 | 0.02 |
| PCYT2                       | Ethanolamine-phosphate cytidyltransferase                     | S10      | 5.4  | 0.02 |
|                             |                                                               | S163     | 2.4  | 0.03 |
| FABP1                       | Fatty acid-binding protein, liver                             | S11      | 4.0  | 0.02 |
| GPAT1                       | Glycerol-3-phosphate acyltransferase 1, mitochondrial         | S687S694 | 83.4 | 0.02 |
| GPAT3                       | Glycerol-3-phosphate acyltransferase 3                        | S66S68   | 4.0  | 0.02 |
| HSL                         | Hormone-sensitive lipase                                      | S559     | 2.9  | 0.02 |
| HACD3                       | 3-hydroxyacyl-CoA dehydratase 3                               | S114     | 6.1  | 0.02 |
| PPAP2A                      | Lipid phosphate phosphohydrolase 1                            | S273     | 14.2 | 0.02 |
| PPAP2B                      | Lipid phosphate phosphohydrolase 3                            | S19      | 4.6  | 0.02 |
| MSR1                        | Macrophage scavenger receptor types I and II                  | S22S23   | 2.0  | 0.02 |
| MCAT                        | Malonyl-CoA-acyl carrier protein transacylase, mitochondrial  | S40      | 4.1  | 0.02 |
| ZDHC5                       | Membrane-associated DHHC5 zinc finger protein                 | S380T385 | 6.8  | 0.02 |
| PANK2                       | Pantothenate kinase 2 (Hallervorden-Spatz syndrome)           | S42      | 11.7 | 0.02 |
| PLIN5                       | Perilipin-5                                                   | S264T268 | 2.2  | 0.03 |
| CDSA                        | Phosphatidate cytidyltransferase                              | S20      | 6.8  | 0.02 |
|                             |                                                               | S22      | 12.5 | 0.02 |
|                             |                                                               | T30      | 10.0 | 0.02 |
|                             |                                                               | S32      | 4.9  | 0.02 |
| LPIN2                       | Phosphatidate phosphatase LPIN2                               | S186S187 | 3.9  | 0.02 |
|                             |                                                               | S245     | 3.0  | 0.02 |
| PTGES3                      | Prostaglandin E synthase 3                                    | S113     | 3.2  | 0.02 |
| PDXDC1                      | Pyridoxal-dependent decarboxylase domain-containing protein 1 | S30      | 2.1  | 0.02 |
| PPP6R2                      | SAPS domain family, member 2, isoform CRA_a                   | S617     | 12.5 | 0.03 |
|                             |                                                               | S669     | 2.3  | 0.03 |
| SERINC1                     | Serine incorporator 1                                         | S364     | 2.7  | 0.02 |
| PPP4R3A                     | Serine/threonine-protein phosphatase 4 regulatory subunit 3A  | S728     | 72.7 | 0.02 |
| HDLBP                       | Vigilin                                                       | S31      | 3.9  | 0.02 |
| <b>Membrane trafficking</b> |                                                               |          |      |      |

SUPPLEMENTARY DATA

|                                |                                                                    |                 |       |      |
|--------------------------------|--------------------------------------------------------------------|-----------------|-------|------|
| AP1M1                          | AP-1 complex subunit mu-1                                          | T152            | 8.7   | 0.02 |
|                                |                                                                    | T154            | 8.6   | 0.02 |
| CLINT1                         | Clathrin interactor 1                                              | S227S232        | 3.5   | 0.03 |
| DENNB5B                        | DENN domain-containing protein 5B                                  | T1062S1068      | 25.8  | 0.03 |
| EPN1                           | Epsin-1                                                            | T415            | 3.1   | 0.03 |
|                                |                                                                    | S416            | 17.2  | 0.01 |
|                                |                                                                    | S419            | 16.3  | 0.01 |
| EPN2                           | Epsin 2                                                            | S192            | 3.3   | 0.03 |
|                                |                                                                    | S195Y196        | 5.2   | 0.02 |
| GOLGA3                         | Golgin subfamily A member 3                                        | S60             | 2.6   | 0.02 |
|                                |                                                                    | S277            | 2.1   | 0.02 |
| SYTL2                          | Isoform 2 of Synaptotagmin-like protein 2                          | S685            | 3.4   | 0.03 |
| TMPO                           | Lamina-associated polypeptide 2, isoforms alpha/zeta               | S155            | 7.0   | 0.03 |
|                                |                                                                    | S158T159        | 6.4   | 0.02 |
| TMPO                           | Lamina-associated polypeptide 2, isoforms beta/delta/epsilon/gamma | S176Y182        | 12.5  | 0.02 |
|                                |                                                                    | S183            | 9.0   | 0.02 |
|                                |                                                                    | MCG8317         | S1076 | 6.3  |
|                                |                                                                    | S1566           | 7.2   | 0.02 |
| NSFL1C                         | NSFL1 cofactor p47                                                 | S176            | 4.9   | 0.02 |
| OPTN                           | Optineurin                                                         | S187            | 3.0   | 0.02 |
| CASK                           | Peripheral plasma membrane protein CASK                            | S577            | 3.4   | 0.02 |
|                                |                                                                    | S582            | 6.9   | 0.02 |
| PICALM                         | Phosphatidylinositol-binding clathrin assembly protein             | T301            | 25.1  | 0.02 |
| LRP1                           | Prolow-density lipoprotein receptor-related protein 1              | S4521           | 3.6   | 0.02 |
|                                |                                                                    | S4524T4525      | 3.7   | 0.02 |
| TPR                            | Protein Tpr                                                        | S2141           | 4.9   | 0.02 |
|                                |                                                                    | S2223           | 3.4   | 0.02 |
| SH3BP19                        | SH3 domain-containing protein 19                                   | S366            | 10.1  | 0.02 |
| SRP72                          | Srp72 signal recognition particle 72                               | S620            | 4.5   | 0.02 |
|                                |                                                                    | S621S625S630    | 2.8   | 0.02 |
| TXLNA                          | Taxilin alpha                                                      | S515            | 4.0   | 0.02 |
| SSR3                           | Translocon-associated protein subunit gamma                        | S105            | 104.4 | 0.04 |
| VAMP4                          | Vesicle-associated membrane protein 4                              | S30             | 8.2   | 0.02 |
| WDR44                          | WD repeat domain 44                                                | S50             | 3.2   | 0.02 |
| ZFYVE19                        | Zinc finger FYVE domain-containing protein 19                      | S280            | 3.6   | 0.02 |
| <b>Muscle contraction</b>      |                                                                    |                 |       |      |
| MPRIP                          | Myosin phosphatase Rho interacting protein (Fragment)              | S173            | 2.8   | 0.02 |
|                                |                                                                    | S175            | 1.6   | 0.02 |
| MYLK                           | Myosin, light polypeptide kinase                                   | S342            | 5.3   | 0.02 |
|                                |                                                                    | S362S364        | 2.2   | 0.03 |
|                                |                                                                    | S386            | 4.5   | 0.02 |
| MYH9                           | Myosin-9                                                           | T1939S1943      | 8.2   | 0.02 |
| MYH11                          | Myosin-11                                                          | T1951S1954      | 2.9   | 0.02 |
| MYO9B                          | Myosin-IXb                                                         | S1264           | 3.6   | 0.02 |
| MYO6                           | Myosin-VI                                                          | T406            | 4.2   | 0.02 |
| MYO18A                         | Myosin-XVIIIa                                                      | S72             | 6.0   | 0.02 |
|                                |                                                                    | S1994S1998      | 9.0   | 0.02 |
|                                |                                                                    | S2003S2016      | 2.5   | 0.02 |
|                                |                                                                    | Y2035S2037S2039 | 5.1   | 0.02 |
|                                |                                                                    |                 |       |      |
| <b>Oxidation and reduction</b> |                                                                    |                 |       |      |

SUPPLEMENTARY DATA

|                                          |                                                             |                                  |                          |                              |
|------------------------------------------|-------------------------------------------------------------|----------------------------------|--------------------------|------------------------------|
| ASPH                                     | Aspartate-beta-hydroxylase                                  | S14                              | 6.6                      | 0.03                         |
| CATALASE                                 | Catalase                                                    | Y161<br>S166                     | 2.9<br>2.6               | 0.02<br>0.03                 |
| COIL                                     | Coilin                                                      | S146                             | 9.1                      | 0.02                         |
| CCS                                      | Copper chaperone for superoxide dismutase                   | S267                             | 1.8                      | 0.03                         |
| CYP3A13                                  | CYP3A13                                                     | S501                             | 21.5                     | 0.02                         |
| HACL1                                    | 2-Hydroxyacyl-CoA lyase 1                                   | S4<br>S6<br>S18                  | 4.0<br>4.0<br>4.2        | 0.02<br>0.03<br>0.03         |
| HAAO                                     | 3-Hydroxyanthranilate 3,4-dioxygenase                       | S9                               | 4.4                      | 0.02                         |
| HPD                                      | 4-Hydroxyphenylpyruvate dioxygenase                         | S250                             | 2.8                      | 0.03                         |
| BCKDHA                                   | 2-Oxoisovalerate dehydrogenase subunit alpha, mitochondrial | S334<br>T335<br>S336<br>S344Y350 | 1.8<br>2.0<br>2.1<br>3.6 | 0.03<br>0.03<br>0.03<br>0.02 |
| MTHFD1                                   | C-1-tetrahydrofolate synthase, cytoplasmic                  | S549                             | 6.6                      | 0.02                         |
| DNYD                                     | Dihydropyrimidine dehydrogenase [NADP+]                     | S905                             | 5.6                      | 0.02                         |
| FAM63A                                   | Fam63a protein                                              | S103<br>S440                     | 6.2<br>2.7               | 0.02<br>0.02                 |
| GLRX5                                    | Glutaredoxin-related protein 5, mitochondrial               | S151                             | 2.9                      | 0.02                         |
| GSTP1                                    | Glutathione S-transferase P 1                               | S195<br>S196                     | 21.3<br>24.4             | 0.02<br>0.02                 |
| HGD                                      | Homogentisate 1,2-dioxygenase                               | S438<br>S440                     | 10.2<br>9.4              | 0.02<br>0.02                 |
| HADH                                     | Hydroxyacyl-coenzyme A dehydrogenase, mitochondrial         | S13                              | 2.6                      | 0.03                         |
| PRDX6                                    | Peroxiredoxin-6                                             | T192                             | 3.5                      | 0.03                         |
| FAM73B                                   | Protein FAM73B                                              | T273<br>S276                     | 5.9<br>4.8               | 0.02<br>0.02                 |
| IWS1                                     | Protein IWS1 homolog                                        | S295<br>S321<br>S458S460         | 18.5<br>2.3<br>3.1       | 0.01<br>0.02<br>0.02         |
| KIAA0284                                 | Protein KIAA0284                                            | S1122<br>S1166                   | 1.6<br>1.8               | 0.03<br>0.03                 |
| PDHA1                                    | Pyruvate dehydrogenase E1 alpha 1                           | T231<br>S293S295S300             | 2.9<br>3.3               | 0.02<br>0.02                 |
| NDUFV3                                   | RIKEN cDNA 1500032D16, isoform CRA_a                        | T149S155<br>S161S163<br>S165     | 7.6<br>7.1<br>5.7        | 0.02<br>0.02<br>0.02         |
| TDO2                                     | Tryptophan 2,3-dioxygenase                                  | S19                              | 7.2                      | 0.02                         |
| <b>Protein and amino acid metabolism</b> |                                                             |                                  |                          |                              |
| APEH                                     | Acylamino-acid-releasing enzyme                             | S185                             | 5.7                      | 0.02                         |
| PSMD1                                    | Proteasome 26S subunit, non-ATPase regulatory subunit 1     | T311S315                         | 5.6                      | 0.02                         |
| BHMT                                     | Betaine—homocysteine S-methyltransferase 1                  | S330<br>S333                     | 9.6<br>13.8              | 0.02<br>0.02                 |

SUPPLEMENTARY DATA

|        |                                                                                 |           |      |      |
|--------|---------------------------------------------------------------------------------|-----------|------|------|
| OASA   | Cysteine synthase                                                               | S33       | 1.7  | 0.03 |
| DCAF8  | DDB1- and CUL4-associated factor 8                                              | S100      | 2.6  | 0.02 |
| DIS3L2 | DIS3-like exonuclease 2                                                         | S864      | 14.6 | 0.02 |
| STT3B  | Dolichyl-diphosphooligosaccharide—<br>protein glycosyltransferase subunit STT3B | S495S496  | 9.7  | 0.02 |
| DTD1   | D-tyrosyl-tRNA(Tyr) deacylase 1                                                 | S204S205  | 3.4  | 0.02 |
| HECTD1 | E3 ubiquitin-protein ligase HECTD1                                              | S632      | 4.7  | 0.02 |
|        |                                                                                 | S1383     | 10.3 | 0.03 |
|        |                                                                                 | S1575     | 5.4  | 0.02 |
| HUWE1  | E3 ubiquitin-protein ligase HUWE1                                               | S1395     | 8.4  | 0.02 |
|        |                                                                                 | T1579     | 1.7  | 0.03 |
|        |                                                                                 | S1903     | 6.8  | 0.02 |
|        |                                                                                 | T1905     | 4.9  | 0.02 |
| MGRN1  | E3 ubiquitin-protein ligase MGRN1                                               | S428      | 5.1  | 0.02 |
| NEDD4  | E3 ubiquitin-protein ligase NEDD4                                               | T287      | 3.2  | 0.02 |
|        |                                                                                 | S309      | 6.1  | 0.02 |
| NEDD4L | E3 ubiquitin-protein ligase NEDD4-like                                          | S477S478  | 7.7  | 0.02 |
| UBR3   | E3 ubiquitin-protein ligase UBR3                                                | S1055     | 5.8  | 0.02 |
| UBR4   | E3 ubiquitin-protein ligase UBR4                                                | T2721     | 8.3  | 0.02 |
| ZNRF2  | E3 ubiquitin-protein ligase ZNRF2                                               | Y17S18S20 | 2.5  | 0.02 |
| EML4   | Echinoderm microtubule-associated<br>protein-like 4                             | S144S146  | 3.6  | 0.02 |
| NMT1   | Glycylpeptide N-tetradecanoyltransferase 1                                      | S15       | 3.7  | 0.02 |
|        |                                                                                 | S31       | 4.3  | 0.02 |
|        |                                                                                 | S47       | 3.6  | 0.02 |
| NMT2   | Glycylpeptide N-tetradecanoyltransferase 2                                      | S38       | 1.8  | 0.03 |
| HAL    | Histidine ammonia-lyase                                                         | S631      | 7.8  | 0.02 |
|        |                                                                                 | S635      | 16.2 | 0.02 |
|        |                                                                                 | T637      | 10.8 | 0.02 |
|        |                                                                                 | S643      | 7.4  | 0.02 |
| LARP1  | La-related protein 1                                                            | S68S81    | 7.6  | 0.02 |
|        |                                                                                 | S188      | 10.4 | 0.03 |
|        |                                                                                 | T196      | 17.0 | 0.02 |
|        |                                                                                 | S198S201  | 21.3 | 0.03 |
|        |                                                                                 | T297S302  | 6.7  | 0.02 |
|        |                                                                                 | Y488T492  | 52.2 | 0.02 |
|        |                                                                                 | S494      | 34.0 | 0.02 |
|        |                                                                                 | S498      | 52.2 | 0.02 |
|        |                                                                                 | T503      | 7.6  | 0.02 |
|        |                                                                                 | S525      | 33.8 | 0.02 |
|        |                                                                                 | S743      | 3.9  | 0.02 |
|        |                                                                                 | T747S751  | 4.3  | 0.02 |
|        |                                                                                 | S1034     | 1.9  | 0.02 |
| TGOLN1 | MCG129299                                                                       | S28       | 4.2  | 0.02 |
|        |                                                                                 | S31       | 5.2  | 0.02 |
|        |                                                                                 | S126      | 37.8 | 0.02 |
|        |                                                                                 | T146      | 4.5  | 0.02 |
|        |                                                                                 | S210      | 2.5  | 0.02 |
|        |                                                                                 | S230      | 2.7  | 0.03 |
|        |                                                                                 | S231      | 2.7  | 0.02 |
|        |                                                                                 | S266S67   | 2.9  | 0.02 |
| NRD1   | Nardilysin                                                                      | S85       | 5.1  | 0.02 |
| WWP2   | NEDD4-like E3 ubiquitin-protein ligase<br>WWP2                                  | S211      | 2.3  | 0.03 |
| MME    | Nepilysin                                                                       | S6        | 3.9  | 0.02 |

SUPPLEMENTARY DATA

|                        |                                                        |            |      |      |
|------------------------|--------------------------------------------------------|------------|------|------|
| OTUD4                  | OTU domain-containing protein 4                        | S1016S1017 | 13.2 | 0.02 |
| PNPLA7                 | Patatin-like phospholipase domain-containing protein 7 | S379       | 5.3  | 0.02 |
| PJA1                   | Pja1 protein                                           | S156       | 7.0  | 0.02 |
| PGRMC1                 | Progesterone receptor membrane component 1             | T74        | 7.4  | 0.02 |
|                        |                                                        | T178       | 13.7 | 0.02 |
|                        |                                                        | Y180S181   | 26.1 | 0.02 |
| PSMF1                  | Proteasome inhibitor PI31 subunit                      | S153       | 3.8  | 0.02 |
| PAG1                   | Proteasome subunit alpha type                          | S250       | 4.0  | 0.02 |
| DPY19L1                | Protein dpy-19 homolog 1                               | S23        | 11.4 | 0.02 |
| TRIP12                 | Protein Trip12                                         | T1457      | 4.2  | 0.02 |
|                        |                                                        | T1459      | 3.7  | 0.02 |
| HPN                    | Serine protease hepsin                                 | S15        | 12.6 | 0.02 |
|                        |                                                        | T16        | 2.5  | 0.03 |
| TMEM51                 | Transmembrane protein 51                               | S114       | 1.8  | 0.02 |
| TAT                    | Tyrosine aminotransferase                              | S448       | 4.6  | 0.02 |
| USP39                  | U4/U6.U5 tri-snRNP-associated protein 2                | S81        | 38.1 | 0.02 |
| COQ9                   | Ubiquinone biosynthesis protein COQ9, mitochondrial    | S81        | 3.9  | 0.02 |
| USP                    | Ubiquitin carboxyl-terminal hydrolase                  | S691       | 4.0  | 0.02 |
|                        |                                                        | S2045      | 6.2  | 0.02 |
|                        |                                                        | S2559      | 4.4  | 0.02 |
| USP10                  | Ubiquitin carboxyl-terminal hydrolase 10               | T205       | 5.2  | 0.02 |
|                        |                                                        | S208       | 6.1  | 0.02 |
|                        |                                                        | S359       | 2.5  | 0.02 |
| USP36                  | Ubiquitin carboxyl-terminal hydrolase 36               | S435       | 1.9  | 0.03 |
| USP47                  | Ubiquitin carboxyl-terminal hydrolase 47               | T933S934   | 1.6  | 0.02 |
| UBE4B                  | Ubiquitin conjugation factor E4 B                      | S105       | 19.1 | 0.02 |
| UBA1                   | Ubiquitin-activating enzyme E1, Chr X                  | S13        | 2.6  | 0.02 |
| UBAP2L                 | Ubiquitin-associated protein 2-like                    | T114       | 2.8  | 0.02 |
|                        |                                                        | S628       | 31.3 | 0.02 |
| UBE2E2                 | Ubiquitin-conjugating enzyme E2 E2                     | S18        | 4.5  | 0.02 |
| UBE2J1                 | Ubiquitin-conjugating enzyme E2 J1                     | S266       | 11.5 | 0.02 |
|                        |                                                        | T267       | 8.0  | 0.02 |
| UBL7                   | Ubiquitin-like protein 7                               | S230       | 11.0 | 0.02 |
| SHP1                   | UBX domain-containing protein 1                        | S188       | 4.2  | 0.02 |
| <b>Protein folding</b> |                                                        |            |      |      |
| SNTA1                  | Alpha-1-syntrophin                                     | S194       | 3.7  | 0.02 |
| CANX                   | Calnexin                                               | S553       | 8.3  | 0.02 |
|                        |                                                        | T561       | 8.4  | 0.02 |
|                        |                                                        | S563       | 8.3  | 0.02 |
|                        |                                                        | S582       | 7.3  | 0.02 |
| DNAJC5                 | DnaJ homolog subfamily C member 5                      | S10        | 8.3  | 0.02 |
|                        |                                                        | T11        | 11.3 | 0.02 |
| DNAJC7                 | DnaJ homolog subfamily C member 17                     | S112       | 2.5  | 0.03 |
| DNAJC21                | Dnajc21 Protein                                        | S132       | 9.4  | 0.02 |
| FKBP15                 | FK506-binding protein 15                               | S1125      | 4.4  | 0.02 |
|                        |                                                        | S1159      | 6.2  | 0.02 |
| HSP84B                 | Heat shock protein 84b                                 | S226       | 5.9  | 0.02 |
|                        |                                                        | S255S261   | 3.8  | 0.02 |
| HSP90A                 | Heat shock protein HSP 90-alpha                        | S231       | 2.2  | 0.03 |
|                        |                                                        | S252       | 3.5  | 0.02 |
|                        |                                                        | S263       | 3.1  | 0.02 |



SUPPLEMENTARY DATA

|                                      |                                                                                      |                                                                                 |                                                      |                                                              |
|--------------------------------------|--------------------------------------------------------------------------------------|---------------------------------------------------------------------------------|------------------------------------------------------|--------------------------------------------------------------|
| PPIG                                 | Peptidyl-prolyl cis-trans isomerase G                                                | S685<br>S714<br>S742S743T746                                                    | 25.9<br>15.2<br>1.9                                  | 0.04<br>0.03<br>0.03                                         |
| FAM54B                               | Protein FAM54B                                                                       | S234S235                                                                        | 2.9                                                  | 0.02                                                         |
| FRA10AC1                             | Protein FRA10AC1 homolog                                                             | S250                                                                            | 2.3                                                  | 0.02                                                         |
| URI1                                 | Unconventional prefoldin RPB5 interactor                                             | S440                                                                            | 4.9                                                  | 0.02                                                         |
| <b>Regulation of GTPase activity</b> |                                                                                      |                                                                                 |                                                      |                                                              |
| ARFGAP2                              | ADP-ribosylation factor GTPase-activating protein 2                                  | S236                                                                            | 6.0                                                  | 0.02                                                         |
| ARFGEF2                              | ADP-ribosylation factor guanine nucleotide-exchange factor 2 (Brefeldin A-inhibited) | S218T224S227                                                                    | 6.2                                                  | 0.02                                                         |
| ALKBH3                               | Alsin                                                                                | S483                                                                            | 10.1                                                 | 0.02                                                         |
| AGFG1                                | Arf-GAP domain and FG repeats-containing protein 1                                   | T177S179S181                                                                    | 3.9                                                  | 0.02                                                         |
| ASAP2                                | Arf-GAP with SH3 domain, ANK repeat and PH domain-containing protein 2               | S704                                                                            | 2.3                                                  | 0.02                                                         |
| BCR                                  | Breakpoint cluster region protein                                                    | Y31                                                                             | 150.9                                                | 0.02                                                         |
| BCAR3                                | Breast cancer anti-estrogen resistance protein 3                                     | S312                                                                            | 3.0                                                  | 0.02                                                         |
|                                      | CDC42 GTPase-activating protein                                                      | S381<br>S1163                                                                   | 3.1<br>4.2                                           | 0.02<br>0.02                                                 |
| ARHGAP5                              | Rho GTPase-activating protein 5                                                      | T1172S1174S1177                                                                 | 4.9                                                  | 0.02                                                         |
| ARHGEF26                             | Rho guanine nucleotide exchange factor 26                                            | S390                                                                            | 3.5                                                  | 0.02                                                         |
|                                      |                                                                                      |                                                                                 |                                                      |                                                              |
| TNKS1BP1                             | Tankyrase-1-binding protein                                                          | S1061S1063<br>T533<br>S866<br>Y910S911<br>S1131<br>S1440<br>S1611S1612<br>S1657 | 3.8<br>3.0<br>2.3<br>4.5<br>4.8<br>7.4<br>2.0<br>4.8 | 0.02<br>0.02<br>0.02<br>0.02<br>0.02<br>0.02<br>0.02<br>0.02 |
| DENND4A                              | Dennd4a DENN/MADD domain containing 4A                                               | S1586                                                                           | 3.5                                                  | 0.02                                                         |
| DENND4C                              | Dennd4c protein                                                                      | S1096                                                                           | 5.7                                                  | 0.02                                                         |
| GBF1                                 | Golgi-specific brefeldin A-resistance guanine nucleotide exchange factor 1           | S1298<br>T1317S1318                                                             | 5.1<br>6.7                                           | 0.02<br>0.02                                                 |
| GPN1                                 | GPN-loop GTPase 1                                                                    | S338                                                                            | 4.6                                                  | 0.02                                                         |
| G3BP2                                | GTPase activating protein (SH3 domain) binding protein 2                             | T227                                                                            | 3.5                                                  | 0.02                                                         |
| GAPVD1                               | GTPase-activating protein and VPS9 domain-containing protein 1                       | S902                                                                            | 6.6                                                  | 0.02                                                         |
| ITSN1                                | Itsn1 protein                                                                        | S334S335                                                                        | 6.8                                                  | 0.02                                                         |
| ITSN2                                | Itsn2 protein                                                                        | S868                                                                            | 2.7                                                  | 0.02                                                         |
| NOLC1                                | Nolc1 nucleolar and coiled-body phosphoprotein 1 isoform D                           | S562                                                                            | 3.7                                                  | 0.02                                                         |
| RABGAP1                              | Rab GTPase-activating protein 1                                                      | S42                                                                             | 4.7                                                  | 0.02                                                         |
| RABEP1                               | Rab GTPase-binding effector protein 1                                                | S323<br>T324<br>S326                                                            | 11.5<br>5.2<br>11.5                                  | 0.02<br>0.02<br>0.02                                         |
| RABGEF1                              | Rab5 GDP/GTP exchange factor                                                         | T131<br>S132                                                                    | 2.2<br>7.8                                           | 0.03<br>0.02                                                 |

SUPPLEMENTARY DATA

|                       |                                                                              |                   |             |              |
|-----------------------|------------------------------------------------------------------------------|-------------------|-------------|--------------|
| RANBP10               | Ran-binding protein 10                                                       | S414<br>S416      | 5.7<br>14.8 | 0.02<br>0.03 |
| IQGAP2                | Ras GTPase-activating protein-binding protein 2                              | T227<br>Y14S16    | 2.8<br>2.0  | 0.02<br>0.03 |
| RASGRP2               | RAS guanyl-releasing protein 2                                               | S554              | 34.7        | 0.02         |
| ARHGAP1               | Rho GTPase activating protein 1                                              | S91               | 5.7         | 0.02         |
| ARHGAP6               | Rho GTPase-activating protein 6                                              | S824              | 5.5         | 0.02         |
| ARHGAP7               | Rho GTPase-activating protein 7                                              | S86S89<br>S818    | 11.2<br>5.6 | 0.02<br>0.02 |
| ARHGAP12              | Rho GTPase activating protein 12                                             | S163              | 24.0        | 0.03         |
| ARHGAP17              | Rho GTPase-activating protein 17                                             | S162<br>T164      | 3.1<br>2.8  | 0.02<br>0.02 |
| ARHGAP35              | Rho GTPase-activating protein 35                                             | S769T771<br>S1179 | 2.9<br>5.2  | 0.02<br>0.02 |
| ARHGEF                | Rho guanine nucleotide exchange factor 7                                     | S132              | 3.1         | 0.02         |
| ARHGEF12              | Rho guanine nucleotide exchange factor 12                                    | S1327<br>S1389    | 1.9<br>5.8  | 0.02<br>0.02 |
| ARHGEF40              | Rho guanine nucleotide exchange factor 40                                    | S959              | 4.0         | 0.02         |
| RHOJ                  | Rho-related GTP-binding protein RhoJ                                         | S9                | 2.4         | 0.03         |
| SIPA1L1               | Sipa1l1 protein                                                              | S1564             | 3.8         | 0.02         |
| TBC1D10A              | TBC1 domain family member 10A                                                | S18               | 11.6        | 0.02         |
| <b>Reproduction</b>   |                                                                              |                   |             |              |
| ASZ1                  | Ankyrin repeat and SAM domain containing 1                                   | S663              | 2.3         | 0.02         |
| ARG1                  | Arginase-1                                                                   | T281              | 5.2         | 0.02         |
| PGRMC2                | Membrane-associated progesterone receptor component 2                        | Y204<br>T205      | 7.6<br>8.9  | 0.02<br>0.02 |
| STARD10               | PCTP-like protein                                                            | S284S289          | 3.5         | 0.02         |
| <b>RNA processing</b> |                                                                              |                   |             |              |
| ASCC3L1               | Activating signal cointegrator 1 complex subunit 3-like 1                    | S225<br>S339      | 6.7<br>3.2  | 0.02<br>0.02 |
| DDX51                 | ATP-dependent RNA helicase DDX51                                             | S77               | 5.8         | 0.02         |
| DDX54                 | ATP-dependent RNA helicase DDX54                                             | T69<br>S774       | 1.9<br>5.1  | 0.04<br>0.02 |
| BUD13                 | BUD13 homolog                                                                | T144S148          | 3.2         | 0.02         |
| CAST                  | Calpastatin                                                                  | S165<br>S219      | 3.0<br>3.6  | 0.02<br>0.02 |
| CMTR1                 | Cap-specific mRNA (nucleoside-2'-O-)-methyltransferase 1                     | S27S28            | 5.9         | 0.02         |
| PCF11                 | Cleavage and polyadenylation factor subunit homolog ( <i>S. cerevisiae</i> ) | S488S495          | 6.6         | 0.02         |
| CSTF3                 | Cleavage stimulation factor subunit 3                                        | S691              | 7.7         | 0.02         |
| DCUN1D4               | Dcun1d4 protein                                                              | S71               | 7.8         | 0.02         |
| GM6793                | EG627828 protein                                                             | S329<br>S331      | 4.1<br>4.5  | 0.02<br>0.02 |
| ELAC2                 | ElaC homolog 2 ( <i>E. coli</i> )                                            | S814              | 2.9         | 0.02         |
| ESYT2                 | Extended synaptotagmin-2                                                     | S661S662S663      | 4.7         | 0.02         |
| KHSRP                 | Far upstream element-binding protein 2                                       | S182              | 7.1         | 0.02         |
| NOLA4                 | H/ACA ribonucleoprotein complex subunit 4                                    | S451S453<br>S481  | 7.3<br>4.4  | 0.02<br>0.02 |
| HNRNPA1               | Heterogeneous nuclear ribonucleoprotein A1                                   | S6                | 4.6         | 0.02         |
| HNRNPG                | Heterogeneous nuclear ribonucleoprotein                                      | S165              | 1.6         | 0.03         |

SUPPLEMENTARY DATA

|           |                                                  |                                                                                                  |                                                                     |                                                                              |
|-----------|--------------------------------------------------|--------------------------------------------------------------------------------------------------|---------------------------------------------------------------------|------------------------------------------------------------------------------|
|           | G                                                |                                                                                                  |                                                                     |                                                                              |
| HNRNPH    | Heterogeneous nuclear ribonucleoprotein H        | S104                                                                                             | 5.4                                                                 | 0.02                                                                         |
| HNRNPLL   | Heterogeneous nuclear ribonucleoprotein L-like   | Y36                                                                                              | 2.4                                                                 | 0.02                                                                         |
| HNRNPA2B1 | Heterogeneous nuclear ribonucleoproteins A2/B1   | S259                                                                                             | 3.2                                                                 | 0.02                                                                         |
| HNRNPC    | Heterogeneous nuclear ribonucleoproteins C1/C2   | S231<br>S241<br>S246S249<br>S268<br>S306                                                         | 5.0<br>16.7<br>2.2<br>7.9<br>4.3                                    | 0.02<br>0.02<br>0.02<br>0.02<br>0.02                                         |
| HNRPK     | Hnrpk protein                                    | Y280<br>S284<br>S379                                                                             | 2.9<br>5.4<br>3.0                                                   | 0.02<br>0.02<br>0.02                                                         |
| INTS12    | Integrator complex subunit 12                    | S126S127<br>S377                                                                                 | 6.0<br>2.4                                                          | 0.02<br>0.02                                                                 |
| DHX9      | Isoform 2 of ATP-dependent RNA helicase A        | S137                                                                                             | 4.4                                                                 | 0.02                                                                         |
| DBR1      | Lariat debranching enzyme                        | T502                                                                                             | 2.8                                                                 | 0.02                                                                         |
| SRSF7     | MCG17902, isoform CRA_a                          | S181S183<br>S233                                                                                 | 4.2<br>2.0                                                          | 0.02<br>0.03                                                                 |
| RNMT      | mRNA cap guanine-N7 methyltransferase            | S11S15                                                                                           | 3.6                                                                 | 0.02                                                                         |
| CWC22     | pre-mRNA-splicing factor CWC22 homolog isoform 2 | S38<br>S829                                                                                      | 1.8<br>5.1                                                          | 0.03<br>0.02                                                                 |
| PCBP1     | Poly(rC)-binding protein 1                       | S171S173<br>Y183<br>S189                                                                         | 3.1<br>34.4<br>5.4                                                  | 0.02<br>0.02<br>0.02                                                         |
| PCBP2     | Poly(rC)-binding protein 2                       | S183S185S266                                                                                     | 3.8                                                                 | 0.02                                                                         |
| PABP2     | Polyadenylate-binding protein 2                  | S146                                                                                             | 20.5                                                                | 0.02                                                                         |
| FIP1L1    | Pre-mRNA 3'-end-processing factor FIP1           | S479                                                                                             | 5.6                                                                 | 0.02                                                                         |
| PRPF40A   | Pre-mRNA-processing factor 40 homolog A          | S879S881S884                                                                                     | 3.7                                                                 | 0.02                                                                         |
| SCAF8     | Protein SCAF8                                    | T614S617                                                                                         | 5.9                                                                 | 0.02                                                                         |
| KIAA1429  | Protein virilizer homolog                        | S173<br>S1577                                                                                    | 9.2<br>6.6                                                          | 0.02<br>0.02                                                                 |
| RAVER1    | Ribonucleoprotein PTB-binding 1                  | S576                                                                                             | 2.4                                                                 | 0.02                                                                         |
| RBM25     | RNA-binding protein 25                           | S673<br>S675                                                                                     | 5.4<br>14.2                                                         | 0.02<br>0.02                                                                 |
| RBM26     | RNA-binding protein 26                           | S127                                                                                             | 7.2                                                                 | 0.02                                                                         |
| RBM33     | RNA-binding protein 33                           | S243                                                                                             | 6.5                                                                 | 0.02                                                                         |
| RBM39     | RNA-binding protein 39                           | Y95S97<br>S136                                                                                   | 6.0<br>4.2                                                          | 0.02<br>0.02                                                                 |
| RALY      | RNA-binding protein Raly                         | S135<br>T268S270T274                                                                             | 5.5<br>4.7                                                          | 0.02<br>0.02                                                                 |
| SRRM1     | Serine/arginine repetitive matrix 1              | S220<br>S260<br>S387S389<br>S400<br>S401<br>T404<br>S412T414<br>S427S429<br>S448S450<br>S461S463 | 4.5<br>3.5<br>3.5<br>5.2<br>3.8<br>5.2<br>12.0<br>8.0<br>6.1<br>4.2 | 0.02<br>0.02<br>0.02<br>0.02<br>0.02<br>0.02<br>0.03<br>0.02<br>0.02<br>0.02 |



SUPPLEMENTARY DATA

|                            |                                                                                  |              |      |      |
|----------------------------|----------------------------------------------------------------------------------|--------------|------|------|
| PPP4R4                     | Serine/threonine-protein phosphatase 4 regulatory subunit 4                      | S777         | 11.4 | 0.02 |
| SFRS11                     | Sfrs11 protein                                                                   | Y325         | 4.3  | 0.02 |
|                            |                                                                                  | S327         | 4.4  | 0.02 |
|                            |                                                                                  | S342         | 2.9  | 0.02 |
|                            |                                                                                  | S375         | 9.2  | 0.02 |
| SSFA2                      | Sperm specific antigen 2                                                         | S268         | 1.7  | 0.02 |
|                            |                                                                                  | S736S738     | 4.5  | 0.02 |
|                            |                                                                                  | T1129        | 5.8  | 0.03 |
|                            |                                                                                  | S1132        | 5.9  | 0.03 |
| SF3B1                      | Splicing factor 3B subunit 1                                                     | T278         | 6.9  | 0.03 |
| SF3B2                      | Splicing factor 3b, subunit 2                                                    | S414S418S419 | 4.8  | 0.04 |
| SPF45                      | Splicing factor 45                                                               | S155         | 6.8  | 0.02 |
| SRSF6                      | Splicing factor, arginine/serine-rich 6                                          | S303         | 2.0  | 0.02 |
| SFSWAP                     | Splicing factor, suppressor of white-apricot homolog                             | S601         | 1.7  | 0.03 |
| SREK1                      | Splicing regulatory glutamine/lysine-rich protein 1                              | S486         | 5.8  | 0.03 |
| SMAP2                      | Stromal membrane-associated protein 2                                            | S219S224     | 4.8  | 0.02 |
| ZCCHC6                     | Terminal uridylyltransferase 7                                                   | S645         | 4.6  | 0.02 |
| TRA2A                      | Tra2a transformer-2 protein homolog alpha                                        | T200         | 2.4  | 0.03 |
| TRA2B                      | Transformer-2 protein homolog beta                                               | S95S97S99    | 2.8  | 0.02 |
|                            |                                                                                  | S264S266     | 4.4  | 0.02 |
| NSUN2                      | tRNA (cytosine(34)-C(5))-methyltransferase                                       | S688         | 1.8  | 0.02 |
| ZRSR1                      | U2 small nuclear ribonucleoprotein auxiliary factor (U2AF) 1, related sequence 1 | S417         | 3.3  | 0.03 |
|                            |                                                                                  | S418         | 18.6 | 0.02 |
| LUC7                       | LUC7-like                                                                        | S162         | 2.4  | 0.02 |
| ZC3H4                      | Zinc finger CCCH domain-containing protein 4                                     | S92S94       | 15.0 | 0.02 |
| ZRANB2                     | Zinc finger, RAN-binding domain containing 2                                     | S120         | 4.3  | 0.02 |
|                            |                                                                                  | S153         | 2.2  | 0.02 |
|                            |                                                                                  | S188         | 1.9  | 0.02 |
| <b>Signal transduction</b> |                                                                                  |              |      |      |
| PRKAA1                     | 5'-AMP-activated protein kinase catalytic subunit alpha-1                        | S184S187     | 4.0  | 0.02 |
| PRKAA2                     | 5'-AMP-activated protein kinase catalytic subunit alpha-2                        | S489         | 7.3  | 0.02 |
|                            |                                                                                  | S491         | 7.4  | 0.02 |
| PRKAB1                     | 5'-AMP-activated protein kinase subunit beta-1                                   | S108         | 8.2  | 0.02 |
| PRKAG2                     | 5'-AMP-activated protein kinase subunit gamma-2                                  | S87S90       | 6.5  | 0.02 |
|                            |                                                                                  | S194S195S196 | 3.7  | 0.02 |
|                            |                                                                                  |              |      |      |
| AKAP1                      | A-kinase anchor protein 1, mitochondrial                                         | S103         | 9.9  | 0.02 |
|                            |                                                                                  | T487         | 9.1  | 0.02 |
| AKAP2                      | A-kinase anchor protein 2                                                        | S740         | 4.4  | 0.02 |
| AKAP8                      | A-kinase anchor protein 8                                                        | S320S325     | 1.7  | 0.03 |
|                            |                                                                                  | S336         | 1.9  | 0.02 |
| APBB1IP                    | Amyloid beta (A4) protein-binding, family B, member 1 interacting protein        | S507         | 9.4  | 0.02 |
|                            |                                                                                  | S532         | 7.0  | 0.02 |
| AAK1                       | AP2-associated protein kinase 1                                                  | S635         | 2.9  | 0.02 |

SUPPLEMENTARY DATA

|          |                                                                             |              |      |      |
|----------|-----------------------------------------------------------------------------|--------------|------|------|
|          |                                                                             | T638         | 2.5  | 0.02 |
|          |                                                                             | T672         | 1.8  | 0.02 |
| ARRB1    | Beta-arrestin-1                                                             | T411S413     | 2.6  | 0.02 |
| BAIAP2   | Brain-specific angiogenesis inhibitor 1-associated protein 2                | S365         | 4.0  | 0.02 |
|          |                                                                             | S366         | 2.1  | 0.02 |
| BAIAP2L1 | Brain-specific angiogenesis inhibitor 1-associated protein 2-like protein 1 | S421         | 2.5  | 0.03 |
| BCKDK    | Branched chain ketoacid dehydrogenase kinase, isoform CRA_a                 | T32          | 6.6  | 0.02 |
|          |                                                                             | S33          | 6.7  | 0.02 |
| CALCOCO1 | Calcium-binding and coiled-coil domain-containing protein 1                 | S460         | 2.6  | 0.02 |
|          |                                                                             | S466         | 3.7  | 0.02 |
| CAMSAP2  | Calmodulin-regulated spectrin-associated protein 2                          | S456         | 4.7  | 0.02 |
| PRKACB   | cAMP-dependent protein kinase catalytic subunit beta                        | T198         | 34.4 | 0.02 |
| PRKAR2B  | cAMP-dependent protein kinase type II-beta regulatory subunit               | S112         | 2.1  | 0.02 |
| CSNK1D   | Casein kinase 1, delta                                                      | S382         | 4.0  | 0.02 |
| COMT     | Catechol O-methyltransferase                                                | S261         | 4.2  | 0.02 |
| CHN2     | Chimerin (Chimaerin) 2                                                      | S181         | 4.0  | 0.03 |
| CSPG6    | Cspg6                                                                       | S1067        | 4.7  | 0.02 |
| PDPK1    | 3-Phosphoinositide-dependent protein kinase 1                               | S244         | 3.7  | 0.02 |
| DEPTOR   | Depdc6-001                                                                  | S244         | 3.2  | 0.02 |
| DAB2IP   | Disabled homolog 2-interacting protein                                      | S978         | 16.8 | 0.03 |
| DLGAP    | Dlgap4 protein                                                              | S699         | 1.6  | 0.03 |
| EMR1     | EGF-like module-containing mucin-like hormone receptor-like 1               | S926         | 4.8  | 0.02 |
| EPS8     | Epidermal growth factor receptor kinase substrate 8                         | S658         | 2.4  | 0.02 |
| FARP1    | Farp1 FERMRhoGEF (Arhgef) and pleckstrin domain protein 1                   | S373         | 6.2  | 0.02 |
|          |                                                                             | S427         | 9.2  | 0.02 |
|          |                                                                             | T886         | 4.2  | 0.02 |
| FRMD4B   | FERM domain-containing protein 4B                                           | Y675S676S678 | 4.2  | 0.02 |
| FLT4     | FMS-like tyrosine kinase 4                                                  | S953         | 3.1  | 0.02 |
| GPRC5C   | G protein-coupled receptor, family C, group 5, member C                     | S434         | 3.6  | 0.02 |
|          |                                                                             | T436         | 2.1  | 0.02 |
| GOLPH3   | Golph3 protein                                                              | S35          | 29.5 | 0.03 |
| GRB7     | Growth factor receptor-bound protein 7                                      | T417         | 5.5  | 0.02 |
|          |                                                                             | S420         | 13.4 | 0.02 |
| ITPR1    | Inositol 1,4,5-trisphosphate receptor type 1                                | S1588        | 11.3 | 0.02 |
| PIIP5K2  | Inositol hexakisphosphate and diphosphoinositol-pentakisphosphate kinase 2  | S44          | 4.2  | 0.02 |
| INPP5F   | Inositol polyphosphate-5-phosphatase F                                      | S908S910     | 3.0  | 0.02 |
|          |                                                                             | S943         | 5.7  | 0.02 |
| IR       | Insulin receptor                                                            | S1337        | 12.5 | 0.02 |
| PI4K2B   | Isoform 2 of Phosphatidylinositol 4-kinase beta                             | S294         | 10.2 | 0.02 |
| KSR1     | Kinase suppressor of ras 1                                                  | S297         | 3.3  | 0.02 |
| LRRFIP2  | Leucine-rich repeat flightless-interacting protein 2                        | S111         | 4.7  | 0.02 |
|          |                                                                             | T114         | 3.6  | 0.02 |
| TMEM57   | Macoilin                                                                    | S331         | 11.4 | 0.02 |
| STK3     | Mammalian sterile twenty 3 kinase                                           | T172         | 3.9  | 0.03 |

SUPPLEMENTARY DATA

|          |                                                                              |                  |      |      |
|----------|------------------------------------------------------------------------------|------------------|------|------|
| MAPKAPK2 | MAP kinase-activated protein kinase 2                                        | T320T324         | 3.5  | 0.02 |
| MAPK14   | Mapk14 protein                                                               | T180Y182         | 4.0  | 0.02 |
| PPP1R12B | MCG130490                                                                    | T645             | 3.0  | 0.02 |
|          |                                                                              | S833T836         | 1.5  | 0.04 |
| MCC      | MCG4620, isoform CRA_b                                                       | S293             | 4.3  | 0.02 |
|          | MCG5232                                                                      | T19S20           | 21.2 | 0.02 |
| MTMR3    | MCG9626, isoform CRA_b                                                       | S633S636         | 1.9  | 0.03 |
| MRAP2    | Melanocortin-2 receptor accessory protein                                    | S94T97           | 5.5  | 0.02 |
| MTSS1    | Metastasis suppressor protein 1                                              | S276             | 5.6  | 0.02 |
|          |                                                                              | S279             | 4.8  | 0.02 |
| MINK1    | Misshapen-like kinase 1                                                      | S729             | 3.0  | 0.02 |
| MFF      | Mitochondrial fission factor                                                 | S129             | 13.2 | 0.02 |
| MAP2K2   | Mitogen activated protein kinase kinase 2, isoform CRA_d                     | S393             | 5.0  | 0.02 |
| MARCKS   | Myristoylated alanine-rich C-kinase substrate                                | S46              | 2.8  | 0.03 |
|          |                                                                              | S138             | 3.3  | 0.02 |
|          |                                                                              | S141T143         | 4.1  | 0.02 |
| SLC9A3R1 | Na(+)/H(+) exchange regulatory cofactor NHE-RF1                              | S273S275         | 4.9  | 0.02 |
|          |                                                                              | S285S286         | 3.0  | 0.02 |
|          |                                                                              | T288S294S289S297 | 3.6  | 0.02 |
| PDZK1    | Na(+)/H(+) exchange regulatory cofactor NHE-RF3                              | S489S492         | 5.2  | 0.03 |
| NUCB1    | Nucleobindin-1                                                               | S85              | 3.8  | 0.03 |
|          |                                                                              | S368             | 3.2  | 0.02 |
| OSTF1    | Osteoclast-stimulating factor 1                                              | Y208             | 13.0 | 0.02 |
| GIGYF1   | PERQ amino acid-rich with GYF domain-containing protein 1                    | S864             | 4.4  | 0.02 |
| PSD3     | PH and SEC7 domain-containing protein 3                                      | S1001            | 2.1  | 0.02 |
|          |                                                                              | S281             | 49.1 | 0.03 |
|          |                                                                              | S1009            | 2.1  | 0.02 |
| UHRF1    | PHD and RING finger domain-containing protein 1                              | S1201            | 10.6 | 0.03 |
| PI4K2    | Phosphatidylinositol 4-kinase beta                                           | S428             | 7.4  | 0.02 |
| PI4K2A   | Phosphatidylinositol 4-kinase type 2-alpha                                   | S47              | 3.9  | 0.02 |
| PAQR9    | Progesterin and adipoQ receptor family member 9                              | S33              | 8.5  | 0.02 |
| AKT1S1   | Proline-rich AKT1 substrate 1                                                | S188             | 3.1  | 0.02 |
| PRKD3    | Protein kinase D3                                                            | S735             | 11.2 | 0.02 |
|          |                                                                              | T739             | 3.6  | 0.02 |
| PRKAR1A  | Protein kinase, cAMP dependent regulatory, type I, alpha                     | S83              | 4.4  | 0.02 |
|          |                                                                              | S97              | 2.8  | 0.02 |
| PRKRA    | Protein kinase, interferon inducible double stranded RNA dependent activator | S18              | 1.6  | 0.03 |
| LAP2     | Protein LAP2                                                                 | S869             | 6.1  | 0.02 |
| NDRG2    | Protein NDRG2                                                                | S328T330S332     | 6.2  | 0.02 |
|          |                                                                              | T334             | 4.8  | 0.02 |
|          |                                                                              | S335S338         | 6.1  | 0.02 |
|          |                                                                              | S346             | 3.9  | 0.02 |
|          |                                                                              | T348S350         | 4.2  | 0.04 |
|          |                                                                              | S352             | 4.5  | 0.02 |
|          |                                                                              | S355             | 4.2  | 0.04 |
|          |                                                                              | S353             | 39.5 | 0.02 |
|          |                                                                              | T357             | 3.7  | 0.02 |
| NDRG3    | Protein NDRG3                                                                | S331             | 10.2 | 0.02 |

SUPPLEMENTARY DATA

|          |                                                        |            |      |      |
|----------|--------------------------------------------------------|------------|------|------|
| PPP1R12A | Protein phosphatase 1 regulatory subunit 12A           | T443       | 4.2  | 0.02 |
|          |                                                        | S445       | 3.7  | 0.02 |
|          |                                                        | Y446       | 4.2  | 0.02 |
|          |                                                        | S507       | 16.8 | 0.03 |
|          |                                                        | T508       | 2.7  | 0.03 |
|          |                                                        | S909       | 1.9  | 0.03 |
| PPP1R12C | Protein phosphatase 1 regulatory subunit 12C           | S431T432   | 4.3  | 0.02 |
| PPP1R12A | Protein phosphatase 1 regulatory subunit 14A           | S26        | 6.9  | 0.02 |
|          |                                                        | S28        | 6.5  | 0.02 |
|          |                                                        | S134S136   | 3.1  | 0.02 |
| PPP1R7   | Protein phosphatase 1 regulatory subunit 7             | S24S27     | 50.7 | 0.02 |
|          |                                                        | S45S48     | 2.6  | 0.02 |
| PPM1K    | Protein phosphatase 1K, mitochondrial                  | S248       | 4.2  | 0.02 |
| SSH1     | Protein phosphatase Slingshot homolog 1                | S639       | 3.9  | 0.02 |
|          |                                                        | S927       | 3.9  | 0.03 |
|          |                                                        | S928       | 4.3  | 0.02 |
|          |                                                        | S929       | 4.2  | 0.02 |
| AKT1     | RAC-alpha serine/threonine-protein kinase              | S124       | 3.5  | 0.02 |
| RGL2     | Ral guanine nucleotide dissociation stimulator-like 2  | S619       | 2.3  | 0.02 |
| RGL3     | Ral guanine nucleotide dissociation stimulator-like 3  | S506S509   | 3.3  | 0.02 |
| RALBP1   | RalA-binding protein 1                                 | S29        | 8.7  | 0.02 |
| REPS2    | RALBP1 associated Eps domain containing protein 2      | S531       | 2.8  | 0.02 |
| RASAL2   | Rasal2 Uncharacterized protein                         | S986T987   | 1.9  | 0.02 |
| RRAS2    | Ras-related protein R-Ras2                             | S186       | 6.9  | 0.02 |
| RIPK1    | Receptor-interacting serine/threonine-protein kinase 1 | S313       | 3.4  | 0.02 |
| RAPTOR   | Regulatory-associated protein of mTOR                  | S863       | 3.8  | 0.02 |
|          |                                                        | S877       | 10.5 | 0.02 |
| ARAF     | Serine/threonine-protein kinase A-Raf                  | S270       | 60.9 | 0.02 |
|          |                                                        | S578S580   | 5.9  | 0.02 |
| MARK2    | Serine/threonine-protein kinase MARK2                  | T208       | 7.2  | 0.02 |
| CDC42BPB | Serine/threonine-protein kinase MRCK beta              | S1688S1692 | 5.2  | 0.02 |
| PAK4     | Serine/threonine-protein kinase PAK 4                  | S104       | 3.2  | 0.02 |
| PRPF4B   | Serine/threonine-protein kinase PRP4 homolog           | S240S242   | 14.3 | 0.03 |
|          |                                                        | S278       | 2.5  | 0.02 |
|          |                                                        | S427S437   | 2.0  | 0.02 |
|          |                                                        | Y849       | 7.5  | 0.02 |
| SGK3     | Serine/threonine-protein kinase Sgk3                   | S126S129   | 10.1 | 0.02 |
| SIK3     | Serine/threonine-protein kinase SIK3                   | S493       | 4.6  | 0.02 |
| TAO3     | Serine/threonine-protein kinase TAO3                   | S324       | 3.7  | 0.02 |
| SHE      | SH2 domain-containing adapter protein E                | S64        | 1.7  | 0.04 |
| SH2B2    | SH2B adapter protein 2                                 | S107       | 1.6  | 0.03 |
| SH3BP5   | SH3 domain-binding protein 5                           | S422       | 3.7  | 0.02 |
| SHC1     | SHC-transforming protein 1                             | S139       | 6.0  | 0.02 |
| SNRK     | SNF-related serine/threonine-protein kinase            | S541       | 27.4 | 0.02 |
|          |                                                        | T543       | 27.2 | 0.02 |
|          |                                                        | S544       | 1.6  | 0.04 |
|          |                                                        | S569S570   | 3.6  | 0.02 |
| TENC1    | Tensin-like C1 domain-containing phosphatase           | S102       | 6.7  | 0.02 |
|          |                                                        | T103       | 3.3  | 0.02 |



SUPPLEMENTARY DATA

|                      |                                                                  |          |      |      |
|----------------------|------------------------------------------------------------------|----------|------|------|
|                      |                                                                  | S813     | 7.0  | 0.02 |
|                      |                                                                  | S825     | 1.6  | 0.03 |
|                      |                                                                  | S1087    | 7.5  | 0.02 |
| TRPM7                | Transient receptor potential cation channel subfamily M member 7 | T1250    | 4.8  | 0.03 |
|                      |                                                                  | S1502    | 8.7  | 0.02 |
| FAS                  | Tumor necrosis factor receptor superfamily member 6              | S220     | 18.5 | 0.03 |
| LRRFIP2              | leucine-rich repeat flightless-interacting protein 2-like        | S107     | 2.2  | 0.02 |
| WDR26                | WD repeat-containing protein 26                                  | S101S103 | 3.7  | 0.02 |
| <b>Transcription</b> |                                                                  |          |      |      |
| ATN1                 | Atrophin-1                                                       | S34      | 6.8  | 0.03 |
| BCLAF1               | Bcl-2-associated transcription factor 1                          | S177     | 9.4  | 0.02 |
|                      |                                                                  | T256S261 | 5.1  | 0.02 |
|                      |                                                                  | S258     | 5.0  | 0.02 |
|                      |                                                                  | S263     | 9.2  | 0.02 |
|                      |                                                                  | S267     | 6.3  | 0.02 |
|                      |                                                                  | Y283     | 9.4  | 0.02 |
|                      |                                                                  | S286     | 9.3  | 0.02 |
|                      |                                                                  | S289     | 9.4  | 0.02 |
|                      |                                                                  | S395     | 5.6  | 0.02 |
|                      |                                                                  | S494     | 4.5  | 0.02 |
|                      |                                                                  | S510     | 3.4  | 0.03 |
|                      |                                                                  | S529     | 6.1  | 0.02 |
|                      |                                                                  | S646     | 33.3 | 0.02 |
|                      |                                                                  | S656     | 4.8  | 0.02 |
| MIIT1                | Btk-PH-domain binding protein                                    | S463     | 2.3  | 0.02 |
| C2CD2L               | C2 domain-containing protein 2-like                              | S470     | 7.1  | 0.02 |
| CARHSP1              | Calcium regulated heat stable protein 1                          | S31      | 3.1  | 0.02 |
| CES5B                | Carboxylesterase 5, isoform CRA_b                                | S552     | 4.5  | 0.03 |
| CTNNB1               | Catenin beta-1                                                   | S191     | 2.6  | 0.02 |
|                      |                                                                  | T551     | 1.6  | 0.02 |
|                      |                                                                  | S552     | 8.2  | 0.05 |
| CTNND1               | Catenin delta-1                                                  | Y228     | 4.4  | 0.02 |
|                      |                                                                  | S230     | 3.5  | 0.02 |
|                      |                                                                  | S252     | 10.4 | 0.02 |
|                      |                                                                  | Y257     | 5.7  | 0.02 |
|                      |                                                                  | S268S269 | 5.3  | 0.02 |
|                      |                                                                  | T310     | 10.1 | 0.02 |
|                      |                                                                  | S920     | 3.9  | 0.02 |
| CBX1                 | Cbx1 protein                                                     | S89S91   | 3.9  | 0.02 |
| CBX3                 | Cbx3 protein                                                     | S93S97   | 2.3  | 0.03 |
|                      |                                                                  | S95      | 48.7 | 0.02 |
|                      |                                                                  | S99      | 19.5 | 0.02 |
| CERS2                | Ceramide synthase 2                                              | S341     | 9.8  | 0.02 |
| CBX5                 | Chromobox protein homolog 5                                      | S93      | 7.0  | 0.02 |
| CHD4                 | Chromodomain-helicase-DNA-binding protein 4                      | S1528    | 20.9 | 0.03 |
| CHD5                 | Chromodomain helicase DNA binding protein 5                      | T1077    | 3.8  | 0.03 |
| CC2D1A               | Coiled-coil and C2 domain-containing protein 1A                  | S435     | 4.3  | 0.02 |
| CRTC2                | CREB-regulated transcription coactivator 2                       | S612     | 4.7  | 0.02 |
| CRTC3                | CREB-regulated transcription coactivator 3                       | S368S370 | 5.2  | 0.02 |
| XRN2                 | 5'-3' Exoribonuclease 2                                          | S448     | 5.2  | 0.02 |

SUPPLEMENTARY DATA

|                     |                                                                    |              |      |      |
|---------------------|--------------------------------------------------------------------|--------------|------|------|
|                     |                                                                    | S470         | 16.3 | 0.02 |
|                     |                                                                    | S499S501     | 6.6  | 0.02 |
| PSMD9               | Proteasome 26S subunit, non-ATPase regulatory subunit 9            | S126S128     | 7.2  | 0.02 |
| DNA BINDING PROTEIN | DNA-binding protein A                                              | S328         | 3.4  | 0.02 |
| POLR3G              | DNA-directed RNA polymerase III subunit RPC7                       | S158         | 40.0 | 0.02 |
| EPS8L2              | Epidermal growth factor receptor kinase substrate 8-like protein 2 | S242         | 1.8  | 0.03 |
|                     |                                                                    | S482         | 4.6  | 0.02 |
|                     |                                                                    | S483         | 2.2  | 0.03 |
|                     |                                                                    | S468         | 2.1  | 0.03 |
| ERRFI1              | ERBB receptor feedback inhibitor 1                                 | S251S256     | 5.0  | 0.02 |
| SSRP2               | FACT complex subunit SSRP1                                         | S444         | 4.3  | 0.02 |
| FOXK2               | Forkhead box protein K2                                            | S329S331     | 4.6  | 0.02 |
| FOXO1               | Forkhead box protein O1                                            | S284         | 3.3  | 0.02 |
| GCFC2               | GC-rich sequence DNA-binding factor 1                              | S262         | 19.4 | 0.02 |
| GTF3C2              | General transcription factor 3C polypeptide 2                      | S163         | 9.2  | 0.02 |
| HDGF                | Hepatoma-derived growth factor                                     | S132S133     | 6.2  | 0.02 |
|                     |                                                                    | S165         | 6.7  | 0.02 |
| HDGFRP2             | Hepatoma-derived growth factor-related protein 2                   | S366S367     | 14.2 | 0.02 |
|                     |                                                                    | S620         | 4.1  | 0.02 |
|                     |                                                                    | S629S635     | 1.8  | 0.03 |
| HNRNPD0             | Heterogeneous nuclear ribonucleoprotein D0                         | S71S80S82S83 | 5.7  | 0.02 |
| HNRNPUL2            | Heterogeneous nuclear ribonucleoprotein U-like protein 2           | S159T163     | 3.3  | 0.02 |
|                     |                                                                    | S166         | 1.6  | 0.03 |
|                     |                                                                    | S183         | 15.8 | 0.02 |
|                     |                                                                    | S186         | 16.0 | 0.02 |
|                     |                                                                    | S653         | 3.4  | 0.02 |
| HMG5                | High mobility group nucleosome-binding domain-containing protein 5 | S167         | 2.2  | 0.02 |
| HDAC2               | Histone deacetylase 2                                              | S394         | 2.3  | 0.02 |
| HIST1H4             | Histone H4                                                         | S48          | 5.6  | 0.02 |
| EHMT1               | Histone-lysine N-methyltransferase EHMT1                           | S81          | 11.3 | 0.02 |
| NSD3                | Histone-lysine N-methyltransferase NSD3                            | S560S561     | 2.8  | 0.02 |
| HTATSF1             | HIV TAT specific factor 1                                          | S388 S408    | 2.3  | 0.03 |
|                     |                                                                    | S441         | 3.7  | 0.02 |
|                     |                                                                    | S446         | 4.1  | 0.03 |
|                     |                                                                    | S613         | 1.9  | 0.03 |
|                     |                                                                    | S679         | 2.4  | 0.02 |
| ING5                | Inhibitor of growth protein 5                                      | S148         | 12.7 | 0.03 |
| INO80               | INO80 complex subunit C                                            | S26          | 1.9  | 0.03 |
| IRF2BP1             | Interferon regulatory factor 2-binding protein 1                   | S384         | 2.2  | 0.02 |
|                     |                                                                    | S453         | 4.5  | 0.03 |
| IRF2BPL             | Interferon regulatory factor 2-binding protein-like                | S313         | 5.6  | 0.02 |
|                     |                                                                    | S315         | 3.0  | 0.03 |
|                     |                                                                    | S526         | 5.3  | 0.02 |
| IRF3                | Interferon regulatory factor 3                                     | S135         | 5.9  | 0.02 |
| HABP4               | Intracellular hyaluronan-binding protein 4                         | S74          | 3.9  | 0.03 |
|                     |                                                                    | S108         | 6.7  | 0.02 |
| IRF2BP2             | Irf2bp2 interferon regulatory factor 2                             | T73          | 3.1  | 0.02 |

SUPPLEMENTARY DATA

|            |                                                                              |                                                                          |                                                |                                                      |
|------------|------------------------------------------------------------------------------|--------------------------------------------------------------------------|------------------------------------------------|------------------------------------------------------|
|            | binding protein 2                                                            | S169<br>S229<br>S440                                                     | 5.5<br>5.1<br>2.1                              | 0.02<br>0.02<br>0.03                                 |
| KLF12      | Krueppel-like factor 12                                                      | S202                                                                     | 22.9                                           | 0.03                                                 |
| KLF3       | Krueppel-like factor 3                                                       | S71                                                                      | 4.4                                            | 0.02                                                 |
| LDB1       | LIM domain-binding protein 1                                                 | S305<br>T306                                                             | 2.6<br>4.6                                     | 0.02<br>0.02                                         |
| PHF2       | Lysine-specific demethylase PHF2                                             | S1057<br>S1059                                                           | 17.0<br>2.8                                    | 0.02<br>0.02                                         |
| MXRA7      | Matrix-remodelling associated 7                                              | S79                                                                      | 4.6                                            | 0.02                                                 |
| MCG_120563 | MCG120563, isoform CRA_a                                                     | S91S92                                                                   | 19.4                                           | 0.02                                                 |
|            | MCG127409                                                                    | S366                                                                     | 22.9                                           | 0.02                                                 |
| SOX6       | MCG141507, isoform CRA_a                                                     | S98                                                                      | 7.5                                            | 0.02                                                 |
| MTFR1      | MCG19781, isoform CRA_a                                                      | S119                                                                     | 6.2                                            | 0.02                                                 |
| MED1       | Mediator of RNA polymerase II transcription subunit 1                        | S1157                                                                    | 5.9                                            | 0.03                                                 |
| MED19      | Mediator of RNA polymerase II transcription subunit 19                       | S226                                                                     | 4.2                                            | 0.02                                                 |
| MAGI1      | Membrane-associated guanylate kinase, WW and PDZ domain-containing protein 1 | S733S736<br>S737                                                         | 546.6<br>4.2                                   | 0.02<br>0.02                                         |
| MTA2       | Metastasis-associated protein MTA2                                           | S435                                                                     | 17.0                                           | 0.02                                                 |
| MBD2       | Methyl-CpG-binding protein 2                                                 | S80                                                                      | 2.2                                            | 0.02                                                 |
| MYCT1      | Myc target protein 1                                                         | S66                                                                      | 8.8                                            | 0.02                                                 |
| NELFE      | Negative elongation factor E                                                 | S51<br>S113<br>S115                                                      | 3.0<br>4.4<br>3.3                              | 0.02<br>0.02<br>0.02                                 |
| WASL       | Neural Wiskott-Aldrich syndrome protein                                      | S422                                                                     | 3.3                                            | 0.03                                                 |
| NKAP       | NF-kappa-B-activating protein                                                | S141                                                                     | 4.8                                            | 0.02                                                 |
| NFIB       | nuclear factor 1 B-type isoform X5                                           | S303<br>S323<br>S324<br>T326<br>S327<br>S331                             | 10.6<br>6.4<br>5.6<br>5.1<br>5.1<br>5.2        | 0.02<br>0.02<br>0.02<br>0.02<br>0.02<br>0.02         |
| ILF3       | Interleukin enhancer-binding factor 3                                        | S382                                                                     | 3.5                                            | 0.03                                                 |
| NUFIP2     | Nuclear fragile X mental retardation-interacting protein 2                   | S213<br>S626                                                             | 3.6<br>3.7                                     | 0.02<br>0.02                                         |
| NCOA2      | Nuclear receptor coactivator 2                                               | T773                                                                     | 23.2                                           | 0.02                                                 |
| NCOA5      | Nuclear receptor coactivator 5                                               | S29S34                                                                   | 3.5                                            | 0.02                                                 |
| NCOR1      | Nuclear receptor corepressor 1                                               | S2198                                                                    | 3.0                                            | 0.02                                                 |
| DDX21      | Nucleolar RNA helicase 2                                                     | S89<br>T114S118                                                          | 3.5<br>6.3                                     | 0.03<br>0.02                                         |
| PSIP1      | PC4 and SFRS1-interacting protein                                            | S105S106<br>T115<br>S118<br>T122S129<br>T134<br>T269S270<br>T271S272S274 | 3.6<br>4.3<br>4.5<br>4.3<br>4.9<br>3.2<br>19.6 | 0.02<br>0.02<br>0.02<br>0.02<br>0.02<br>0.02<br>0.02 |
| PNN        | Pinin                                                                        | S66<br>S100<br>S120                                                      | 5.4<br>5.0<br>3.8                              | 0.02<br>0.02<br>0.02                                 |
| RING6      | Polycomb group RING finger protein 6                                         | S118                                                                     | 3.9                                            | 0.02                                                 |
| PKD2       | Polycystin-2                                                                 | S810                                                                     | 9.2                                            | 0.02                                                 |

SUPPLEMENTARY DATA

|         |                                                                        |                                              |                                  |                                      |
|---------|------------------------------------------------------------------------|----------------------------------------------|----------------------------------|--------------------------------------|
| PROX1   | Prospero homeobox protein 1                                            | S177<br>S197<br>S199<br>S511                 | 3.6<br>6.5<br>4.1<br>5.5         | 0.02<br>0.02<br>0.02<br>0.02         |
| LYRIC   | Protein LYRIC                                                          | S417S423<br>T561                             | 4.6<br>7.6                       | 0.02<br>0.02                         |
| PML     | Protein PML                                                            | S17<br>T535                                  | 5.6<br>6.8                       | 0.02<br>0.02                         |
| RRP5    | Protein RRP5 homolog                                                   | S1468                                        | 3.3                              | 0.02                                 |
| ZMYND8  | Protein Zmynd8                                                         | S649<br>S754                                 | 2.9<br>1.9                       | 0.02<br>0.02                         |
| RPRD1B  | Regulation of nuclear pre-mRNA domain-containing protein 1B            | S132<br>S134                                 | 4.5<br>3.9                       | 0.02<br>0.02                         |
| RPS6KA4 | Ribosomal protein S6 kinase alpha-4                                    | S745                                         | 2.5                              | 0.02                                 |
| RBM5    | RNA binding motif protein 15                                           | S127<br>S258Y265<br>S291<br>T668S674S678     | 5.6<br>4.1<br>3.9<br>4.8         | 0.02<br>0.02<br>0.02<br>0.02         |
| ELL     | RNA polymerase II elongation factor ELL                                | S299<br>S300                                 | 8.0<br>7.7                       | 0.02<br>0.02                         |
| RPAP3   | RNA polymerase II-associated protein 3                                 | S429                                         | 3.1                              | 0.02                                 |
| CTR9    | RNA polymerase-associated protein CTR9 homolog                         | S941S943<br>S970<br>S1039S1041<br>S1079S1083 | 8.2<br>7.6<br>26.4<br>23.2       | 0.02<br>0.02<br>0.02<br>0.02         |
| RBM10   | RNA-binding protein 10                                                 | S718S723                                     | 5.5                              | 0.02                                 |
| RBM14   | RNA-binding protein 14                                                 | T206                                         | 5.0                              | 0.02                                 |
| RPRD1B  | Rprd1b Protein                                                         | S33                                          | 3.0                              | 0.02                                 |
| SLTM    | SAFB-like transcription modulator                                      | S289<br>T535<br>S550<br>S995<br>S996T997S999 | 5.4<br>4.9<br>11.6<br>7.1<br>3.8 | 0.02<br>0.02<br>0.02<br>0.02<br>0.02 |
| SRSF10  | Serine/arginine-rich splicing factor 10                                | S131S133                                     | 2.5                              | 0.02                                 |
| STAT5B  | Signal transducer and activator of transcription 5B                    | Y699                                         | 4.6                              | 0.02                                 |
| SUDS3   | Sin3 histone deacetylase corepressor complex component SDS3            | S234S236S237                                 | 3.1                              | 0.02                                 |
| SGTA    | Small glutamine-rich tetratricopeptide repeat-containing protein alpha | T82<br>S303<br>T305S307                      | 2.0<br>2.1<br>2.6                | 0.02<br>0.03<br>0.02                 |
| SLIRP   | SRA stem-loop-interacting RNA-binding protein, mitochondrial           | T104                                         | 5.2                              | 0.02                                 |
| SKIV2L  | Superkiller viralicidic activity 2-like (S. cerevisiae)                | S240                                         | 6.8                              | 0.02                                 |
| SMARCC1 | SWI/SNF complex subunit SMARCC1                                        | S327S329                                     | 10.2                             | 0.02                                 |
| SMARCC2 | SWI/SNF complex subunit SMARCC2                                        | S283<br>S302S304S306T308                     | 7.4<br>6.0                       | 0.02<br>0.02                         |
| TBX3    | Tbx3 protein                                                           | S387                                         | 9.7                              | 0.02                                 |
| TCF20   | Tcf20 protein                                                          | S588                                         | 5.8                              | 0.02                                 |
| TCOF1   | Tcof1 protein                                                          | S592S593                                     | 4.7                              | 0.02                                 |
| THRAP3  | Thrap3 protein                                                         | S34S45<br>T47                                | 8.7<br>8.8                       | 0.02<br>0.02                         |
| THRAP3  | Thyroid hormone receptor associated                                    | S183                                         | 4.6                              | 0.02                                 |

SUPPLEMENTARY DATA

|                    |                                                  |              |      |      |
|--------------------|--------------------------------------------------|--------------|------|------|
|                    | protein 3                                        | S240         | 5.4  | 0.02 |
|                    |                                                  | S248S253     | 5.2  | 0.02 |
|                    |                                                  | S669         | 2.3  | 0.03 |
|                    |                                                  | S184         | 15.7 | 0.02 |
|                    |                                                  | S187         | 10.3 | 0.02 |
|                    |                                                  | S190         | 15.7 | 0.02 |
|                    |                                                  | S679         | 4.7  | 0.02 |
|                    |                                                  | S695         | 16.6 | 0.03 |
| TNS1               | Torsin-1A-interacting protein 1                  | S140         | 10.3 | 0.02 |
| TCEA1              | Transcription elongation factor A protein 1      | S96          | 6.1  | 0.02 |
|                    |                                                  | S97          | 4.7  | 0.02 |
|                    |                                                  | S100         | 7.5  | 0.02 |
| TCEB3              | Transcription elongation factor B polypeptide 3  | S195         | 1.7  | 0.02 |
| ETV6               | Transcription factor ETV6                        | Y17T18       | 4.0  | 0.02 |
| PURB               | Transcriptional activator protein Pur-beta       | S310S316     | 3.3  | 0.03 |
| ATRX               | Transcriptional regulator ATRX                   | Y89          | 4.2  | 0.02 |
|                    |                                                  | S92T98       | 5.4  | 0.02 |
|                    |                                                  | S912         | 1.6  | 0.03 |
| TMCO1              | Transmembrane and coiled-coil domains protein 1  | S410         | 4.3  | 0.02 |
| TRIM28             | Tripartite motif-containing 28                   | S50          | 2.5  | 0.02 |
|                    |                                                  | S51          | 6.0  | 0.02 |
|                    |                                                  | S473         | 4.8  | 0.02 |
|                    |                                                  | T599         | 9.3  | 0.02 |
| ZFP36              | Tristetraprolin                                  | S176         | 5.7  | 0.02 |
| IFI204             | Interferon-activable protein 204                 | S190         | 4.3  | 0.02 |
| MYG1               | UPF0160 protein MYG1, mitochondrial              | S283         | 4.7  | 0.02 |
| GPBP1L1            | Vasculin-like protein 1                          | S76          | 4.1  | 0.03 |
|                    |                                                  | S351         | 4.2  | 0.02 |
| YBX1               | Y box protein 1                                  | S163         | 4.8  | 0.02 |
|                    |                                                  | S172         | 4.1  | 0.02 |
|                    |                                                  | S174         | 9.3  | 0.02 |
| YAP1               | Yorkie homolog                                   | S94T95       | 61.2 | 0.02 |
|                    |                                                  | S112         | 45.4 | 0.03 |
| ZC3H3              | Zc3h13 Zinc finger CCCH type containing 13       | S921T926Y927 | 3.8  | 0.03 |
|                    |                                                  | S953         | 3.1  | 0.03 |
| ZFP869             | Zfp869 zinc finger protein 869                   | S155         | 7.3  | 0.02 |
| ZBTB7A             | Zinc finger and BTB domain-containing protein 7A | S537         | 3.5  | 0.02 |
| ZC3H14             | Zinc finger CCCH domain-containing protein 14    | S515         | 4.4  | 0.02 |
| ZC3H18             | Zinc finger CCCH domain-containing protein 18    | S45          | 1.7  | 0.03 |
|                    |                                                  | T62S64S71    | 4.0  | 0.02 |
|                    |                                                  | S92          | 1.7  | 0.03 |
|                    |                                                  | S507         | 1.5  | 0.04 |
|                    |                                                  | S552         | 4.0  | 0.02 |
|                    |                                                  | S849         | 5.9  | 0.02 |
|                    |                                                  | S890         | 2.3  | 0.02 |
| ZNF326             | Zinc finger protein 326                          | S270         | 9.5  | 0.02 |
|                    |                                                  | T274         | 6.3  | 0.03 |
| ZNF687             | Zinc finger protein 687                          | S226         | 5.1  | 0.02 |
| DPF2               | Zinc finger protein ubi-d4                       | S142         | 3.4  | 0.02 |
| <b>Translation</b> |                                                  |              |      |      |
| CTIF               | CBP80/20-dependent translation initiation        | S18          | 2.7  | 0.02 |

SUPPLEMENTARY DATA

|        |                                                      |                        |          |      |      |
|--------|------------------------------------------------------|------------------------|----------|------|------|
|        | factor                                               |                        |          |      |      |
| CLASP2 | Clasp2 protein                                       | S376                   | 10.5     | 0.02 |      |
| EEF1D  | Eef1d protein                                        | T124                   | 4.4      | 0.02 |      |
|        |                                                      | S133                   | 4.8      | 0.02 |      |
|        |                                                      | T142                   | 3.4      | 0.02 |      |
|        |                                                      | S157                   | 3.0      | 0.02 |      |
| EFHD2  | EF hand domain containing 2                          | S74                    | 3.9      | 0.02 |      |
| EFB1   | Elongation factor 1-beta                             | S82                    | 4.6      | 0.02 |      |
|        |                                                      | S106                   | 3.1      | 0.02 |      |
|        |                                                      | S112                   | 6.8      | 0.02 |      |
| EFT2   | Elongation factor 2                                  | T54                    | 9.4      | 0.02 |      |
|        |                                                      | T57T59                 | 11.0     | 0.02 |      |
| EEF2K  | Eukaryotic elongation factor 2 kinase                | S437                   | 11.2     | 0.02 |      |
|        |                                                      | Y442                   | 6.0      | 0.02 |      |
|        |                                                      | S473                   | 6.2      | 0.02 |      |
| EIF3B  | Eukaryotic translation initiation factor 3 subunit B | S90                    | 3.0      | 0.02 |      |
|        |                                                      | T74S75S79              | 4.2      | 0.02 |      |
|        |                                                      | S120S123               | 5.2      | 0.02 |      |
| EIF3C  | Eukaryotic translation initiation factor 3 subunit C | S39                    | 5.8      | 0.02 |      |
| EIF3G  | Eukaryotic translation initiation factor 3 subunit G | T38                    | 7.5      | 0.02 |      |
|        |                                                      | T41                    | 7.8      | 0.02 |      |
|        |                                                      | S42                    | 5.3      | 0.02 |      |
| EIF4G1 | Eukaryotic translation initiation factor 4 gamma 1   | S1096                  | 11.8     | 0.02 |      |
|        |                                                      | S1187                  | 16.9     | 0.02 |      |
|        |                                                      | S1189                  | 6.5      | 0.02 |      |
|        |                                                      | S1211                  | 9.6      | 0.02 |      |
| EIF4G2 | Eukaryotic translation initiation factor 4 gamma 2   | T507                   | 5.0      | 0.02 |      |
| EIF4G3 | Eukaryotic translation initiation factor 4 gamma 3   | S267                   | 6.2      | 0.02 |      |
|        |                                                      | S1150                  | 7.1      | 0.02 |      |
|        |                                                      | S1151                  | 3.4      | 0.02 |      |
| EIF4B  | Eukaryotic translation initiation factor 4B          | S418T420S422           | 10.6     | 0.03 |      |
|        |                                                      | S424                   | 5.5      | 0.03 |      |
|        |                                                      | S497                   | 4.1      | 0.02 |      |
|        |                                                      | S498                   | 5.0      | 0.02 |      |
|        |                                                      | T500                   | 4.6      | 0.02 |      |
|        |                                                      | S504                   | 2.9      | 0.03 |      |
| EIF5B  | Eukaryotic translation initiation factor 5B          | T107S108S114*          | 1.9      | 0.02 |      |
|        |                                                      | S114                   | 3.2      | 0.02 |      |
|        |                                                      | S137S139               | 4.4      | 0.02 |      |
|        |                                                      | S165                   | 81.1     | 0.04 |      |
|        |                                                      | S215                   | 4.3      | 0.02 |      |
| INADL  | InaD-like protein                                    | S455S459               | 3.2      | 0.02 |      |
|        |                                                      | S457                   | 3.0      | 0.03 |      |
| LRRC47 | Leucine rich repeat containing 47                    | S293                   | 1.9      | 0.03 |      |
|        |                                                      | MCG10050               | S102S105 | 16.2 | 0.02 |
| RPLP1  | MCG10168                                             | S101S104               | 7.9      | 0.02 |      |
|        |                                                      | MCG1128, isoform CRA_c | S237     | 5.1  | 0.02 |
| RPS27A | MCG13441                                             | S115                   | 4.7      | 0.02 |      |
|        |                                                      | MCG142467              | S44      | 4.0  | 0.02 |
|        |                                                      | S45                    | 3.8      | 0.02 |      |
| MES1   | Methionyl-tRNA synthetase, cytoplasmic               | S827                   | 10.9     | 0.02 |      |
| NOP56  | Nucleolar protein 56                                 | S513                   | 75.0     | 0.03 |      |
|        |                                                      | S528S529               | 6.6      | 0.02 |      |

SUPPLEMENTARY DATA

|                  |                                                       |                                   |                                 |                                      |
|------------------|-------------------------------------------------------|-----------------------------------|---------------------------------|--------------------------------------|
|                  |                                                       | S536S543                          | 33.9                            | 0.02                                 |
| NOP58            | Nucleolar protein 58                                  | S509<br>T515<br>S516<br>S521      | 8.0<br>13.3<br>5.3<br>8.0       | 0.02<br>0.02<br>0.02<br>0.02         |
| NIBAN            | Protein Niban                                         | S595                              | 4.3                             | 0.02                                 |
| PUM2             | Pumilio homolog 2                                     | S136<br>S181                      | 5.2<br>4.5                      | 0.02<br>0.02                         |
| RPL13            | Ribosomal protein L13                                 | S140                              | 3.5                             | 0.02                                 |
| RPS6             | Ribosomal protein S3                                  | T220                              | 5.3                             | 0.02                                 |
| RPS6             | Ribosomal protein S6                                  | S235S236S240<br>T241              | 12.3<br>1.8                     | 0.02<br>0.02                         |
| P0               | Ribosomal protein, large, P0                          | S304S307                          | 7.8                             | 0.02                                 |
| TNRC6B           | Trinucleotide repeat-containing gene 6B protein       | S600                              | 2.7                             | 0.02                                 |
| <b>Transport</b> |                                                       |                                   |                                 |                                      |
| SLC33A1          | Acetyl-coenzyme A transporter 1                       | S42                               | 16.9                            | 0.02                                 |
| ACBP5            | Acyl-CoA-binding domain-containing protein 5          | S252S253                          | 17.9                            | 0.02                                 |
| HBA-A1           | Alpha globin 1                                        | S4S9                              | 4.0                             | 0.02                                 |
| ADD1             | Alpha-adducin                                         | S586                              | 14.4                            | 0.02                                 |
| ENSA             | Alpha-endosulfine                                     | S108                              | 44.1                            | 0.02                                 |
| AP3B1            | AP-3 complex subunit beta-1                           | Y274<br>S276                      | 2.6<br>3.6                      | 0.02<br>0.02                         |
| AP3D1            | AP-3 complex subunit delta-1                          | S755T758S760<br>S784              | 4.6<br>7.4                      | 0.02<br>0.02                         |
| AQP7             | Aquaporin-7                                           | S295                              | 5.6                             | 0.02                                 |
| ABCA1            | ATP-binding cassette sub-family F member 1            | S107<br>S138<br>S193<br>S225      | 5.5<br>4.2<br>6.4<br>9.1        | 0.02<br>0.02<br>0.03<br>0.02         |
| BETA-GLOBIN      | Beta-globin                                           | S45<br>S51<br>S53<br>T70<br>S81   | 5.5<br>5.5<br>5.0<br>3.2<br>3.9 | 0.02<br>0.02<br>0.02<br>0.02<br>0.02 |
| ABCB11           | Bile salt export pump                                 | S688Y689<br>S696                  | 4.5<br>6.9                      | 0.02<br>0.02                         |
| ABCC1            | Canalicular multispecific organic anion transporter 1 | S279                              | 5.1                             | 0.02                                 |
| IGF2R            | Cation-independent mannose-6-phosphate receptor       | S2401                             | 5.2                             | 0.02                                 |
| COPB2            | Coatomer subunit beta'                                | S845                              | 4.2                             | 0.02                                 |
| UQCRC1           | Cytochrome b-c1 complex subunit 1, mitochondrial      | S212T214                          | 9.2                             | 0.02                                 |
| PITPNC1          | Cytoplasmic phosphatidylinositol transfer protein 1   | S274                              | 14.7                            | 0.02                                 |
| RANBP            | E3 SUMO-protein ligase RanBP2                         | S1603<br>S2088<br>S2640S2641T2646 | 19.6<br>4.4<br>4.8              | 0.02<br>0.02<br>0.02                 |
| SLC4A4           | Electrogenic sodium bicarbonate cotransporter 1       | S239<br>S245                      | 4.4<br>6.7                      | 0.02<br>0.02                         |

SUPPLEMENTARY DATA

|          |                                                         |                  |       |      |
|----------|---------------------------------------------------------|------------------|-------|------|
|          |                                                         | T254S255S256S257 | 6.6   | 0.02 |
|          |                                                         | S1069            | 5.2   | 0.02 |
| ERC1     | ELKS/Rab6-interacting/CAST family member 1              | S14              | 7.4   | 0.02 |
|          |                                                         | S15              | 7.2   | 0.02 |
|          |                                                         | S17S21           | 7.7   | 0.02 |
|          |                                                         | S37              | 3.9   | 0.02 |
| ADD3     | Gamma-adducin                                           | S679             | 2.2   | 0.02 |
| GJB1     | Gap junction protein beta 1                             | S233             | 101.3 | 0.02 |
|          |                                                         | S258             | 21.6  | 0.02 |
|          |                                                         | S266             | 378.6 | 0.02 |
| USO1     | General vesicular transport factor p115                 | S940             | 4.8   | 0.02 |
| GOLIM4   | Golgi integral membrane protein 4                       | S540             | 3.4   | 0.02 |
|          | Isoform 2 of Sorbin and SH3 domain-containing protein 1 | S409S410S411S413 | 13.7  | 0.04 |
|          |                                                         | T414             | 12.3  | 0.03 |
| KLHDC7A  | Kelch domain-containing protein 7A                      | S361             | 11.5  | 0.02 |
| LBR      | Lamin-B receptor                                        | S101             | 1.8   | 0.03 |
| LARP4B   | La-related protein 4B                                   | T735S739         | 3.1   | 0.03 |
| BAG6     | Large proline-rich protein BAG6                         | S995             | 6.4   | 0.02 |
| SLC7A2   | Low affinity cationic amino acid transporter 2          | S645             | 7.7   | 0.02 |
|          | MCG11503                                                | T230S231         | 3.3   | 0.02 |
| STIM2    | MCG1293                                                 | S661             | 6.4   | 0.02 |
| ATP2B1   | MCG13663, isoform CRA a                                 | S1140            | 7.8   | 0.02 |
| SLCO1A1  | MCG6998, isoform CRA b                                  | S649             | 34.3  | 0.02 |
| MIA3     | Melanoma inhibitory activity protein 3                  | S615S617         | 5.3   | 0.02 |
|          |                                                         | S766             | 33.7  | 0.02 |
| SLC16A1  | Monocarboxylate transporter 1                           | S210S213         | 2.2   | 0.03 |
|          |                                                         | S461T462         | 2.8   | 0.02 |
|          |                                                         | S491             | 6.9   | 0.02 |
| SLC16A10 | Monocarboxylate transporter 10                          | S498             | 48.2  | 0.02 |
|          |                                                         | S501             | 48.6  | 0.02 |
| BLT      | Multidrug resistance protein 2                          | S665T666         | 4.2   | 0.03 |
| NACA     | Nascent polypeptide-associated complex subunit alpha    | S151             | 5.2   | 0.02 |
|          |                                                         | T157             | 118.6 | 0.02 |
|          |                                                         | T159             | 1.6   | 0.04 |
|          |                                                         | T161             | 57.6  | 0.02 |
|          |                                                         | S166             | 7.6   | 0.02 |
| SCP2     | Non-specific lipid-transfer protein                     | S8               | 4.8   | 0.02 |
|          |                                                         | S420             | 1.8   | 0.03 |
|          |                                                         | T424S425         | 5.2   | 0.03 |
| NUP98    | Nucleoporin 98                                          | S888             | 1.8   | 0.02 |
| OSBPL9   | Oxysterol-binding protein 9                             | S319             | 3.9   | 0.02 |
|          |                                                         | T327S329S330     | 4.8   | 0.02 |
| OSBPL11  | oxysterol-binding protein-related protein 11            | S21              | 8.3   | 0.02 |
|          |                                                         | S188             | 4.0   | 0.02 |
|          |                                                         | S189S192         | 4.2   | 0.02 |
| PEX1     | Peroxisome biogenesis factor 1                          | S1182            | 2.2   | 0.03 |
|          |                                                         | S1212            | 2.6   | 0.03 |
|          |                                                         | S1217            | 5.6   | 0.02 |
| FXYD1    | Phospholemman                                           | S82S83           | 23.5  | 0.02 |
| KCNK5    | Potassium channel TASK2                                 | S266             | 1.6   | 0.04 |
| KCNQ2    | Potassium voltage-gated channel, subfamily Q, member 2  | S406             | 3.5   | 0.02 |



SUPPLEMENTARY DATA

|          |                                                                      |                  |      |      |
|----------|----------------------------------------------------------------------|------------------|------|------|
| PPF1A1   | Ppf1a1 protein                                                       | S239S242         | 6.1  | 0.02 |
| PSEN2    | Presenilin-2                                                         | S52              | 3.8  | 0.02 |
| CASC3    | Protein CASC3                                                        | S145             | 10.0 | 0.02 |
| SET      | Protein SET                                                          | S30              | 4.0  | 0.02 |
| SEC16B   | Protein transport protein Sec16B                                     | S137             | 2.5  | 0.02 |
|          |                                                                      | S939             | 14.0 | 0.02 |
|          |                                                                      | S944             | 11.0 | 0.03 |
|          |                                                                      | T950             | 14.0 | 0.02 |
| SEC24A   | Protein transport protein Sec24A                                     | T227             | 4.6  | 0.02 |
| SEC31A   | Protein transport protein Sec31A                                     | S526             | 7.6  | 0.02 |
| RANBP3   | Ran-binding protein 3                                                | T56              | 7.3  | 0.02 |
|          |                                                                      | S57              | 5.0  | 0.02 |
|          |                                                                      | S58              | 5.3  | 0.02 |
|          |                                                                      | T60              | 5.0  | 0.02 |
| RRBP1    | Ribosome binding protein 1                                           | S134             | 6.0  | 0.02 |
|          |                                                                      | S959             | 2.6  | 0.02 |
| ATP2A2   | Sarcoplasmic/endoplasmic reticulum calcium ATPase 2                  | S661S663         | 6.1  | 0.02 |
| SEC16A   | SEC16 homolog A ( <i>S. cerevisiae</i> )                             | S2101            | 5.6  | 0.02 |
| SEC23IP  | SEC23-interacting protein                                            | S735             | 8.8  | 0.03 |
| Slc16a7  | Slc16a7 protein                                                      | S214             | 3.2  | 0.02 |
|          |                                                                      | S218T219         | 3.3  | 0.02 |
| SLC6A13  | Sodium- and chloride-dependent GABA transporter 2                    | T587             | 15.3 | 0.02 |
|          |                                                                      | T590             | 16.3 | 0.02 |
| SLC10A1  | Sodium/bile acid cotransporter                                       | T330             | 6.9  | 0.02 |
| SLC38A3  | Sodium-coupled neutral amino acid transporter 3                      | S53              | 11.1 | 0.02 |
| SLC38A4  | Sodium-coupled neutral amino acid transporter 4                      | S49              | 2.5  | 0.02 |
| SLC20A2  | Sodium-dependent phosphate transporter 2                             | S316             | 9.2  | 0.02 |
| SLC2A2   | Solute carrier family 2, facilitated glucose transporter member 2    | S520S522         | 5.3  | 0.02 |
| SLC4A1AP | Solute carrier family 4 (Anion exchanger), member 1, adaptor protein | S50              | 2.3  | 0.02 |
| SLCO1A4  | Solute carrier organic anion transporter family member 1A4           | S657             | 3.4  | 0.02 |
|          |                                                                      | T659             | 3.3  | 0.02 |
| SLCO1B2  | Solute carrier organic anion transporter family member 1B2           | S290             | 29.0 | 0.02 |
|          |                                                                      | S288             | 8.6  | 0.02 |
|          |                                                                      | T662             | 1.5  | 0.03 |
| SLCO2B1  | Solute carrier organic anion transporter family member 2B1           | S21S27           | 6.8  | 0.02 |
|          |                                                                      | S312T313S315     | 11.7 | 0.03 |
| SORBS1   | Sorbin and SH3 domain-containing protein 1                           | S62              | 4.2  | 0.02 |
|          |                                                                      | T1207S1209       | 2.8  | 0.02 |
| SORBS2   | Sorbs2 protein                                                       | S27              | 5.5  | 0.02 |
|          |                                                                      | S274S276         | 1.8  | 0.03 |
|          |                                                                      | S338             | 1.8  | 0.03 |
|          |                                                                      | S357             | 10.2 | 0.02 |
|          |                                                                      | S377S378S380     | 3.9  | 0.02 |
|          |                                                                      | S567S570         | 3.6  | 0.02 |
| SNX17    | Sorting nexin-17                                                     | S433S434S437S440 | 4.8  | 0.02 |
| STIM1    | Stromal interaction molecule 1                                       | S512             | 6.0  | 0.02 |
|          |                                                                      | T517             | 5.5  | 0.02 |
|          |                                                                      | S519S521S523     | 28.0 | 0.02 |
| SNAP     | Synaptosomal-associated protein                                      | S110S112         | 4.4  | 0.02 |

SUPPLEMENTARY DATA

|                         |                                                           |            |      |      |
|-------------------------|-----------------------------------------------------------|------------|------|------|
| SNAP29                  | Synaptosomal-associated protein 29                        | S163       | 3.8  | 0.02 |
| STX4                    | Syntaxin-4                                                | S15        | 5.8  | 0.02 |
|                         |                                                           | S117       | 5.9  | 0.02 |
| STX12                   | Syntaxin 12                                               | S142       | 2.2  | 0.02 |
| TMX1                    | Thioredoxin-related transmembrane protein 1               | S245       | 31.0 | 0.02 |
| TRAM1                   | Tram1 protein                                             | S365       | 12.4 | 0.02 |
| SEC62                   | Translocation protein SEC62                               | T158       | 3.3  | 0.02 |
|                         |                                                           | S356       | 9.3  | 0.02 |
|                         |                                                           | T375       | 11.4 | 0.02 |
| TCOF1                   | Treacle protein                                           | S1252      | 17.6 | 0.03 |
| VPS4B                   | Vacuolar protein sorting 4b (Yeast)                       | S92        | 3.2  | 0.02 |
|                         |                                                           | S102       | 3.8  | 0.02 |
| VPS4A                   | Vacuolar protein sorting-associated protein 4A            | S90        | 8.9  | 0.02 |
|                         |                                                           | S95        | 5.7  | 0.03 |
|                         |                                                           | S97        | 8.9  | 0.02 |
|                         |                                                           | S99        | 7.9  | 0.03 |
| VPS26B                  | Vacuolar protein sorting-associated protein 26B           | S304       | 4.2  | 0.02 |
| <b>Tumorigenesis</b>    |                                                           |            |      |      |
| FLCN                    | Folliculin                                                | S62        | 10.4 | 0.02 |
| PRCC                    | Papillary renal cell carcinoma (Translocation-associated) | S157S159   | 4.6  | 0.02 |
| TPD52                   | Tumor protein D52                                         | S175       | 3.0  | 0.02 |
| TPD54                   | Tumor protein D54                                         | S180       | 5.5  | 0.02 |
| TP53I11                 | Tumor protein p53-inducible protein 11                    | S14        | 5.8  | 0.02 |
| <b>Function unknown</b> |                                                           |            |      |      |
| GPR182                  | Adrenomedullin receptor                                   | S364       | 4.6  | 0.02 |
| CB1_000089029           | Ahnak AHNAK nucleoprotein isoform 1                       | S136       | 3.5  | 0.03 |
|                         |                                                           | S217       | 2.6  | 0.02 |
|                         |                                                           | S5504      | 2.8  | 0.02 |
| ANKRD57                 | Ankyrin repeat domain-containing protein 57               | S82        | 2.9  | 0.02 |
| RSRC2                   | Arginine/serine-rich coiled-coil protein 2                | S45        | 4.6  | 0.02 |
|                         | ASL1/Dennd1b fusion protein                               | S163S164   | 8.4  | 0.02 |
|                         | Cobl-like 1                                               | T266       | 4.6  | 0.02 |
|                         |                                                           | S268T272   | 3.0  | 0.02 |
|                         |                                                           | T287       | 2.8  | 0.02 |
|                         |                                                           | S334       | 7.7  | 0.02 |
|                         |                                                           | S476T480   | 3.5  | 0.02 |
|                         |                                                           | S483       | 3.4  | 0.02 |
|                         |                                                           | T594S596   | 3.4  | 0.02 |
|                         |                                                           | S724       | 5.6  | 0.02 |
|                         |                                                           | S826       | 6.8  | 0.02 |
|                         |                                                           | S827       | 4.8  | 0.02 |
|                         |                                                           | S1022      | 8.4  | 0.02 |
|                         |                                                           | S1144      | 6.7  | 0.02 |
|                         |                                                           | S1145T1147 | 3.5  | 0.02 |
| S1196                   | 2.0                                                       | 0.03       |      |      |
| FAM104a                 | DNA segment, Chr 11, Wayne State University 99, expressed | S15        | 1.6  | 0.04 |
| FAM208A                 | Isoform 2 of Protein FAM208A                              | S653       | 7.3  | 0.02 |
|                         | Isoform 2 of Uncharacterized protein C18orf25 homolog     | S66S69     | 4.6  | 0.02 |

SUPPLEMENTARY DATA

|                   |                                                                              |            |       |      |
|-------------------|------------------------------------------------------------------------------|------------|-------|------|
| KIDINS220         | Kidins220 Kidins220 protein                                                  | S1583      | 13.7  | 0.02 |
| LARP1B            | Larp2 protein                                                                | S60        | 6.9   | 0.02 |
|                   | Likely ortholog of H. sapiens chromosome 9 open reading frame 138 (C9orf138) | T311       | 4.1   | 0.03 |
| RAPH1             | MCG116540, isoform CRA_b                                                     | S192       | 3.4   | 0.02 |
| WDR20             | MCG14935, isoform CRA_a                                                      | S434       | 5.3   | 0.02 |
|                   |                                                                              | S491S492   | 3.9   | 0.02 |
| PDAP1             | MCG17262                                                                     | S48        | 3.3   | 0.03 |
|                   |                                                                              | S60S63     | 7.1   | 0.02 |
|                   | MCG19001                                                                     | S15S17     | 4.1   | 0.02 |
|                   |                                                                              | S261       | 4.6   | 0.02 |
| 9430020K01RI<br>K | MCG55337                                                                     | S542       | 3.6   | 0.02 |
|                   | MCG7378                                                                      | S7         | 8.3   | 0.02 |
|                   |                                                                              | S13S17S19  | 12.0  | 0.02 |
| NAV2              | Nav2 neuron navigator 2 isoform 1                                            | S1262      | 5.1   | 0.02 |
| NCK1              | Non-catalytic region of tyrosine kinase adaptor protein 1                    | S91        | 2.9   | 0.02 |
|                   | Novel protein                                                                | S25        | 2.2   | 0.02 |
| PCDH1             | Pcdh1 Protocadherin 1 isoform 2                                              | S1010S1012 | 9.7   | 0.02 |
| PLEKHA6           | Pleckstrin homology domain-containing family A member 6                      | S901       | 4.2   | 0.03 |
|                   |                                                                              | S967       | 5.3   | 0.02 |
| ALKBH5            | Probable alpha-ketoglutarate-dependent dioxygenase ABH5                      | S384S385   | 4.3   | 0.02 |
| FAM122A           | Protein FAM122A                                                              | S34        | 2.0   | 0.02 |
|                   |                                                                              | S73        | 6.6   | 0.02 |
|                   |                                                                              | S140S144   | 4.2   | 0.02 |
| FAM40A            | Protein FAM40A                                                               | S335       | 3.5   | 0.02 |
| GM7694            | Protein Gm7694                                                               | S47        | 2.2   | 0.02 |
|                   |                                                                              | S219       | 3.4   | 0.02 |
| KRI1              | Protein KRI1 homolog                                                         | S148       | 5.2   | 0.02 |
| KTI12             | Protein KTI12 homolog                                                        | S157       | 2.8   | 0.02 |
| MB21D2            | Protein MB21D2                                                               | T371       | 3.1   | 0.02 |
| PRRC2C            | Protein PRRC2C                                                               | T353       | 2.6   | 0.02 |
|                   |                                                                              | S897       | 16.7  | 0.03 |
|                   |                                                                              | S899       | 24.7  | 0.02 |
|                   | Putative monooxygenase p33MONOX isoform 3                                    | S158       | 3.0   | 0.03 |
|                   |                                                                              | S159T160   | 3.6   | 0.02 |
|                   |                                                                              | S164       | 3.2   | 0.02 |
| RSRC2             | Rsrc2 arginine/serine-rich coiled-coil protein 2 isoform 1                   | S27        | 2.7   | 0.02 |
|                   |                                                                              | S30        | 2.8   | 0.02 |
| D623_1003269<br>3 | Run domain Beclin-1 interacting and 33ysteine-rich containing protein        | S412       | 2.7   | 0.02 |
|                   | Testis development-related protein isoform X3                                | S178       | 10.1  | 0.02 |
|                   |                                                                              | T183       | 9.3   | 0.02 |
|                   |                                                                              | T185       | 9.2   | 0.02 |
| TEX-2             | Testis expressed gene 2                                                      | S743       | 5.6   | 0.02 |
|                   |                                                                              | S749       | 2.2   | 0.03 |
| TEX264            | Tex264 testis expressed gene 264                                             | T237       | 3.8   | 0.02 |
|                   |                                                                              | S302T303   | 6.0   | 0.02 |
| THUMPD1           | THUMP domain-containing protein 1                                            | S86S88     | 6.1   | 0.02 |
| UBN2              | Ubinuclein-2                                                                 | S570       | 119.3 | 0.02 |
|                   | I700021F05Rik Uncharacterized protein C6orf203 homolog                       | S106       | 2.5   | 0.03 |

SUPPLEMENTARY DATA

|           |                                          |          |     |      |
|-----------|------------------------------------------|----------|-----|------|
| UHRFIBPIL | UHRFI-bindingprotein !-like              | S418T420 | 4.1 | 0.02 |
|           | Uncharacterized protein CIOorf47 homolog | T222S223 | 2.9 | 0.02 |
| KIAA1671  | Uncharacterized protein KIAA1671         | S205     | 5.4 | 0.02 |
| CX026     | UPF0368 protein Cxorf26 homolog          | S184     | 3.3 | 0.02 |
| CX052     | UPF0690 protein Clorf52 homolog          | T153     | 3.8 | 0.02 |
| WDR81     | <b>\VD repeat-containing protein 81</b>  | S85      | 2.6 | 0.02 |
